# Supplementary material for: Promyelocytic Leukemia Protein Is an Essential Regulator of Stem Cell Pluripotency and Somatic Cell Reprogramming
Source: PubMed Central journal article supplement — Stem Cell Reports. 2017 Apr 6;8(5):1366–78. doi: 10.1016/j.stemcr.2017.03.006 (PMC5425614; doi:10.1016/j.stemcr.2017.03.006), 2017-04-06
Supplement: mmc2.pdf [file mmc2.pdf]

# Promyelocytic Leukemia Protein Is an Essential Regulator of Stem Cell Pluripotency and Somatic Cell Reprogramming

Christiana Hadjimichael,<sup>1</sup> Konstantina Chanoumidou,<sup>1,3</sup> Christoforos Nikolaou,<sup>2</sup> Antonios Klonizakis,<sup>2</sup> Gesthimani-Ioanna Theodosi,<sup>2</sup> Takis Makatounakis,<sup>1</sup> Joseph Papamatheakis,<sup>1</sup> and Androniki Kretsovali<sup>1,\*</sup>

<sup>1</sup>Institute of Molecular Biology and Biotechnology, Foundation for Research and Technology – Hellas (FORTH), Heraklion, Crete 70013, Greece

<sup>2</sup>Department of Biology, University of Crete, Heraklion, Crete 71409, Greece

<sup>3</sup>Department of Molecular Biology and Genetics, Democritus University of Thrace, Dragana, Alexandroupolis, Evros 68100, Greece

\*Correspondence: [kretsova@imbb.forth.gr](mailto:kretsova@imbb.forth.gr)

<http://dx.doi.org/10.1016/j.stemcr.2017.03.006>

## SUMMARY

Promyelocytic leukemia protein (PML), the main constituent of PML nuclear bodies, regulates various physiological processes in different cell types. However, little is known about its functions in embryonic stem cells (ESC). Here, we report that PML contributes to ESC self-renewal maintenance by controlling cell-cycle progression and sustaining the expression of crucial pluripotency factors. Transcriptional analysis and gain- or loss-of-function approaches showed that PML-deficient ESC exhibit morphological, metabolic, and growth properties distinct to naive and closer to the primed pluripotent state. During differentiation of embryoid bodies, PML influences cell-fate decisions between mesoderm and endoderm by controlling the expression of *Tbx3*. PML loss compromises the reprogramming ability of embryonic fibroblasts to induced pluripotent stem cells by inhibiting the transforming growth factor  $\beta$  pathway at the very early stages. Collectively, these results designate PML as a member of the regulatory network for ESC naive pluripotency and somatic cell reprogramming.

## INTRODUCTION

Pluripotent stem cells (PSC) are characterized by the ability to self-renew indefinitely and to differentiate into all of the three germ lineages—ectoderm, mesoderm, and endoderm—of the developing embryo. During the early developmental stages, mouse embryonic stem cells (mESC) are derived from pre-implantation embryos (embryonic day 3.5 [E3.5]) and possess the “naive” or “ground” pluripotent state, while mouse epiblast stem cells (EpiSC) are isolated from the post-implantation epiblast [E6.5] and represent a more differentiated state, termed “primed.” Interestingly, mESC and EpiSC can be reciprocally converted into one another, using genetic and/or epigenetic modifiers (Chenoweth et al., 2010).

The maintenance of pluripotency is principally regulated by three transcription factors, OCT4, SOX2, and NANOG, which constitute the core pluripotency network. In addition, a growing number of proteins that positively or negatively modulate the function of the core complex have been identified. The importance of the intrinsic pluripotency regulatory network genes is further highlighted by their ability to reprogram somatic cells to induced pluripotent stem cells (iPSC), a cell type resembling ESC. Notably, genes important for stem cell pluripotency are also active in cancers (Hadjimichael et al., 2015), suggesting shared regulatory mechanisms.

The promyelocytic leukemia (*Pml*) gene was first described in the early 1990s as being targeted by a chromo-

somal translocation t(15;17) in acute promyelocytic leukemia (Guan and Kao, 2015) that produces an oncogenic PML-retinoic acid receptor  $\alpha$  (RAR $\alpha$ ) fusion protein (PML-RAR $\alpha$ ). PML protein is the key organizer of spherical subnuclear structures, named PML nuclear bodies (PML-NBs), and is expressed in a variety of tissues. Its function has been thoroughly investigated in multiple cells and it is a critical player in DNA repair, apoptosis, senescence, oncogenesis, and cancer progression (Guan and Kao, 2015). However, its role in stem cells had been neglected until recent studies unveiled intriguing findings regarding PML involvement in the hematopoietic stem cell (HSC) asymmetric divisions and maintenance through activating fatty acid oxidation (FAO) (Nakahara et al., 2014). At the same time, recent reports using embryonal carcinoma cells and ESC showed that PML is involved in the activation of *Oct4* gene expression (Chuang et al., 2011) and belongs to a transcriptional repressive complex that is associated with OCT4 and NANOG (Liang et al., 2008). Although these findings link PML with important pluripotency regulators, the exact role of PML in ESC functions has yet to be clarified.

Here, we addressed the role of PML by investigating the phenotypes of ESC in which the expression of PML was experimentally up- or downregulated. We show that PML ablation impairs ESC self-renewal and pluripotency and promotes the transition from naive to primed-like pluripotent cell state. Moreover, PML depletion upregulates the expression of mesodermal markers and decreases the differentiation toward definitive endoderm. The effect of PML

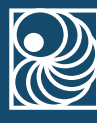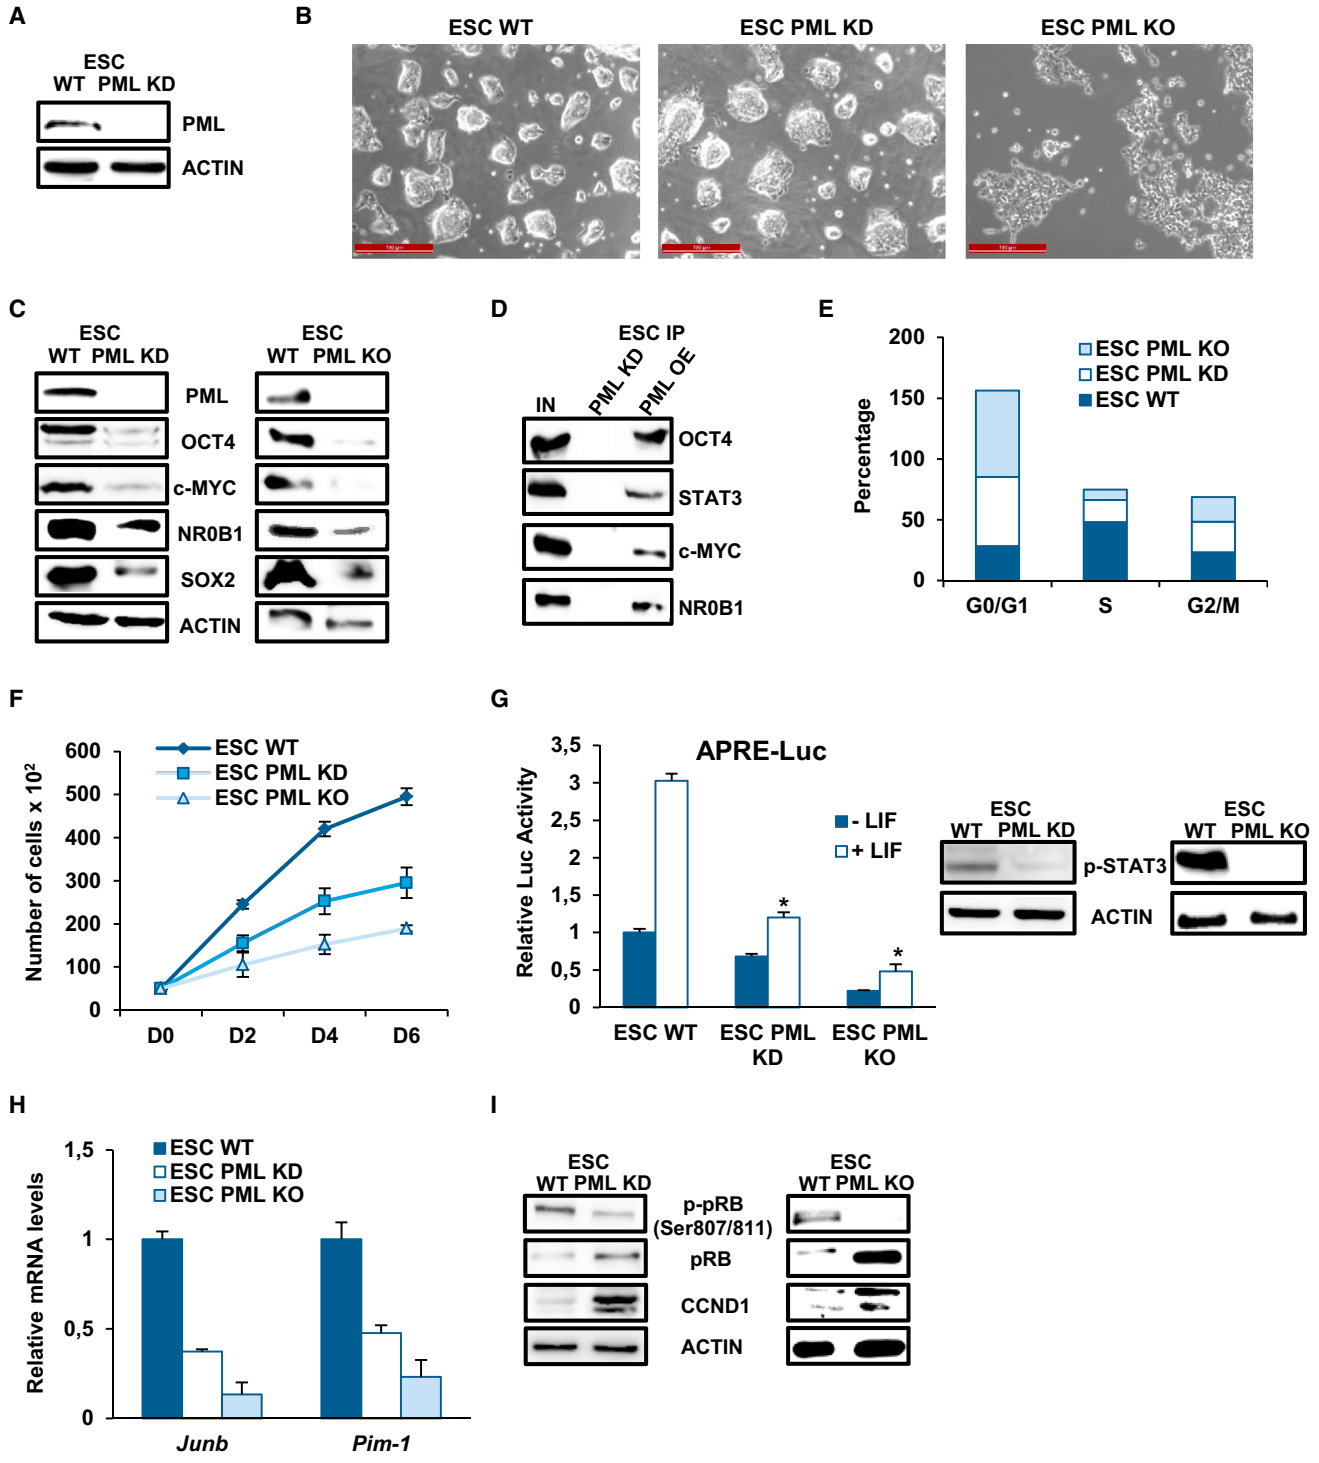

**Figure 1. PML Depletion Impairs Self-Renewal and Affects the Cell Cycle**

(A) PML protein level in one representative PML KD ESC clone and wild type (WT) ESC.  
 (B) Morphology of control (WT), PML KD, and KO ESC. Scale bar, 100  $\mu$ m.  
 (C) Pluripotency factors protein levels upon depletion or deletion of PML.  
 (D) Co-immunoprecipitation of endogenous pluripotency factors (OCT4, c-MYC, STAT3, NR0B1) with endogenous PML from PML OE ESC compared with PML KD ESC.

(legend continued on next page)

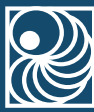

ablation on ESC differentiation can be rescued by TBX3 (a T-box transcription factor) overexpression. Finally, *Pml*<sup>-/-</sup> mouse embryonic fibroblasts (MEF) yield significantly fewer iPSC colonies compared with wild-type (WT) MEF, identifying PML as a pivotal mediator of somatic cell reprogramming.

## RESULTS

### PML Is Essential for Self-Renewal and Pluripotency of ESC

Previous studies showed that ESC treatment with the histone deacetylase inhibitor trichostatin A (TSA) disrupts pluripotency and facilitates early differentiation events (Karantzali et al., 2008). *Pml* was included in the category of genes with reduced expression when cells started differentiating. To examine whether PML is functionally relevant in ESC, we monitored its expression levels upon induction of differentiation utilizing different approaches (embryoid bodies (EB) formation, leukemia inhibitory factor [LIF] withdrawal, retinoic acid, and TSA treatment), and in all cases we observed significantly reduced expression levels (data not shown).

To elucidate the function of PML in the maintenance of ESC pluripotency, we first performed knockdown (KD) of PML using a short hairpin RNA (shRNA) lentiviral vector. The efficiency of PML KD was examined in three independent PML KD ESC lines, the most representative of which is shown in Figure 1A. PML KD cells propagated in both fetal bovine serum (FBS)/LIF and 2i/LIF culture conditions and sustained their ability to form dome-shaped colonies (Figures 1B and S1A). Although no morphological changes were noticed, the expression of several pluripotency factors was significantly diminished in PML KD ESC (OCT4, SOX2, c-MYC, and NR0B1) (Figure 1C). These findings were consistently observed in another ESC cell line (E14) following PML deletion (Figure S1B). To better delve into the effects of PML ablation, we isolated PML knockout (KO) ESC from *Pml*<sup>-/-</sup> mice. These cells displayed distinguishable flattened morphology (Figures 1B and S1A), much slower propagation in naive culture conditions, and greater reduction of pluripotency factor expression levels (Figures 1C and S1C). To further delineate the effect of PML, we generated a stable PML-overexpressing (OE) ESC line using *Pml* expressing vector and detected an

important induction of pluripotency marker expression (Figure S1D).

An earlier study demonstrated that PML physically associates with NANOG and OCT4 (Liang et al., 2008). Our co-immunoprecipitation experiments using PML OE ESC verified the OCT4 interaction and further showed that PML associates with STAT3, c-MYC, and NR0B1, three essential regulators of the naive pluripotent state (Figure 1D). Considering the association with and the regulation of the expression of essential factors, we deduce that PML is involved in the maintenance of ESC stemness.

Recently it was reported that *Pml*-deficient MEF proliferate faster than WT MEF (Tang et al., 2013), which is in agreement with previous data showing that PML inhibits cell proliferation in cancer cells (Guan and Kao, 2015). In contrast to these observations, we noted that PML KD and KO ESC were passaged every 3 and 5 days, respectively, compared with WT (passaged every 2 days); thus we proceeded to analyze the cell-cycle phase structure in the respective cells. Interestingly, an obvious increase of the cell fraction in the G<sub>1</sub> phase accompanied by a reduction of the S phase, but no significant alteration in G<sub>2</sub>/M phase, was detected in PML KD and KO ESC (Figures 1E and S1E). Corroborating these results, the cell proliferation rate showed a significant delay in PML KD and KO ESC (Figure 1F), while PML OE cells exhibited faster proliferation (Figure S1F).

LIF/STAT3 signaling is important for ESC-specific cell-cycle progression (rapid G<sub>1</sub>-S transition) through activation of cell-cycle regulators (e.g., *Jun-b*, *c-myc*, *Pim-1*) (Aksoy et al., 2007; Coronado et al., 2013; White and Dalton, 2005). We therefore examined the effect of PML on LIF/STAT3 signaling pathway using a STAT-dependent reporter (APRE-Luc), and noticed reduced activity in the absence of PML (Figure 1G) and increased activity in PML OE cells (Figure S1F). Further confirmation of this influence is provided by decreased p-STAT3 protein levels in PML KD and KO ESC (Figure 1G), whereas PML OE cells display increased levels (Figure S1G). *c-Myc*, among other LIF/STAT3 targets, is required for ESC self-renewal and drives cell-cycle progression (Singh et al., 2015). In addition to *c-Myc* (Figure 1A), *Jun-b* and *Pim-1* mRNA levels were analyzed in PML KD and KO ESC and were notably lower in comparison with WT ESC (Figure 1H). Thus, both LIF/STAT3 and Myc-mediated mechanisms may account for the decreased cell-cycle progression upon PML ablation.

(E) Cell-cycle analysis of WT, PML KD, and KO ESC.

(F) Growth curve of WT, PML KD, and KO ESC. Error bars indicate ±SD of four independent experiments (n = 4).

(G) The activity of APRE-Luc reporter and p-STAT3 protein expression levels in ESC WT, PML KD, and KO. Data represent the mean + SD of four independent experiments (n = 4). \*p < 0.05.

(H) Relative mRNA levels of cell-cycle regulators *Junb* and *Pim-1*. Data are shown as mean + SD of three independent experiments (n = 3).

(I) Protein levels of cell-cycle regulators p-pRB, pRB, and CCND1 were detected.

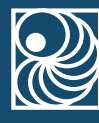

To follow up this hypothesis, we examined the impact of PML on the retinoblastoma (pRB) tumor suppressor and cell-cycle regulator. In mESC, pRB is inactivated by hyperphosphorylation and allows high E2F activity. Upon differentiation, pRB is activated and the G<sub>1</sub>-S checkpoint is established (Sage, 2012). We found that PML KD and KO ESC are characterized by reduced p-pRB protein levels as well as increased levels of total pRB (Figure 1I). In addition, the expression of CYCLIN D1 (CCND1) that is normally induced in differentiating cells (Savatier and Malashicheva, 2004) is also elevated in PML KD and KO cells (Figure 1I). Therefore, we conclude that PML influences ESC self-renewal and pluripotency as well as the G<sub>1</sub>-S transition of cell cycle.

### PML Maintains the Naive Pluripotent State

To better understand how PML depletion affects ESC identity, we performed genome-wide expression analysis from PML KD and WT ESC. As shown in Figure S2A, 3,088 genes are differentially expressed: 1,009 are upregulated (fold change > 1.5,  $p < 0.05$ ) and 2,079 are downregulated (fold change < -1.5,  $p < 0.05$ ) upon PML depletion. Importantly, the functional analysis using the Regulatory Network Enrichment Analysis (RNEA) software (Chouvardas et al., 2016) revealed that several signaling pathways implicated in ESC pluripotency are affected. Namely, in the absence of PML, naive pluripotency-associated bone morphogenetic protein 4 (BMP4), LIF/STAT3, and phosphatidylinositol 3-kinase (PI3K) signaling (Figures S2A and S2B) pathways are reduced, whereas the pro-differentiation ACTIVIN and fibroblast growth factor (FGF) pathways (Figure S2A), which are required for the maintenance of primed pluripotent state, are enriched. Moreover, many genes related to cell cycle (Figure S2B), chromatin organization, and DNA repair are also affected by PML depletion, suggesting that PML contributes to maintenance of ESC properties. Most importantly, several naive characteristic genes (*Nr0b1*, *Tbx3*, *Klf4*, *Klf5*) are downregulated in PML KD ESC, whereas representative primed state markers are elevated (*Fgf5*, *Lefty1*, *Lefty2*) (Figure 2A). These data were confirmed using RT-PCR in both PML KD and KO ESC (Figure S2C). In addition, the protein levels of OTX2, an important brain development transcription factor that is critical for ESC conversion into EpiSC (Acampora et al., 2013), are increased (Figure 2B). On the contrary, the protein levels of the essential naive state regulators NANOG, KLF4, and cadherin 1 (CDH1), recently reported to drive the transition from primed to naive pluripotency (Murayama et al., 2015), are sharply diminished (Figure 2B). Next, we verified that PML ablation negatively affects BMP4 signaling by reducing the activity of BRE-Luc reporter and the expression levels of its transcriptional targets *Ids 1-3* (Figures 2C and 2D). Contrary to the effect

on BMP4 and LIF/STAT3 signaling pathways, PML loss enhances the activity of Smad2/3-responsive element CAGA-Luc reporter upon stimulation with 25 ng/ $\mu$ L ACTIVIN A (Figure 2E). On the other hand, upon PML forced expression, naive and primed markers were raised and lessened, respectively (Figure S2D), in agreement with assays monitoring the activity of corresponding signaling pathways (Figure S2D). Our aforementioned data concerning the cell-cycle distribution are in full agreement with a recent study presenting that the switch from naive to primed state is related to increased duration of G<sub>1</sub> phase (Coronado et al., 2013).

Considering the different metabolic profiles of the two pluripotent states (Zhou et al., 2012) and the function of PML as an activator of FAO in HSC (Ito et al., 2012), we analyzed the oxygen consumption rate and the mitochondrial membrane potential (using tetramethylrhodamine methyl ester dye, TMRE) upon PML deletion. Surprisingly, PML loss in ESC leads to lower mitochondrial respiration and membrane potential compared with WT ESC (Figures S3A–S3C). This reduction is also correlated by the decrease of several FAO and oxidative phosphorylation (OXPHOS) enzyme genes in PML KD ESC (Figure S3D), in line with the metabolic changes upon ESC differentiation.

We next assessed whether PML KD cells show characteristics similar to those of other well-described EpiSC lines, including E3, OG2.1, and C1A1 (GEO: GSM699680, GSM699678, GSM699683). As shown in Figure 2F, PML KD cells were found to localize between the EpiSC and the ESC clusters (GEO: GSM1053554, GSM921484), indicating that these cells exit from naive pluripotency.

Our data illustrate that PML ensures naive pluripotency as manifested by changes in characteristic markers, signaling pathway activity, and cell metabolism following PML perturbations.

### PML Impedes the Conversion from Naive ESC to EpiSC

To gain more insight into the nature of *Pml*<sup>-/-</sup> ESC, we cultured WT and PML KO ESC in the presence of JAK inhibitor for 6 days (JAK inhibitor prevents the activation of the LIF/STAT3 pathway). PML KO, but not WT ESC, proliferated normally in this condition as shown by growth curves and cell morphology (Figures 3A and 3B), demonstrating that they behave similarly to the EpiSC and do not depend on the LIF/STAT3 pathway.

To further evaluate whether PML has a functional role in the narrow window of ESC to EpiSC transition, we treated PML KO, OE, and WT ESC with FGF- $\beta$ /ACTIVIN (F/A), previously shown to permit in vitro EpiSC derivation and maintenance. At day 6 of this conversion, WT and PML OE cells changed from dome-shaped to EpiSC-like flat-shaped colonies (Figure 3C), whereas KO cell morphology

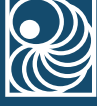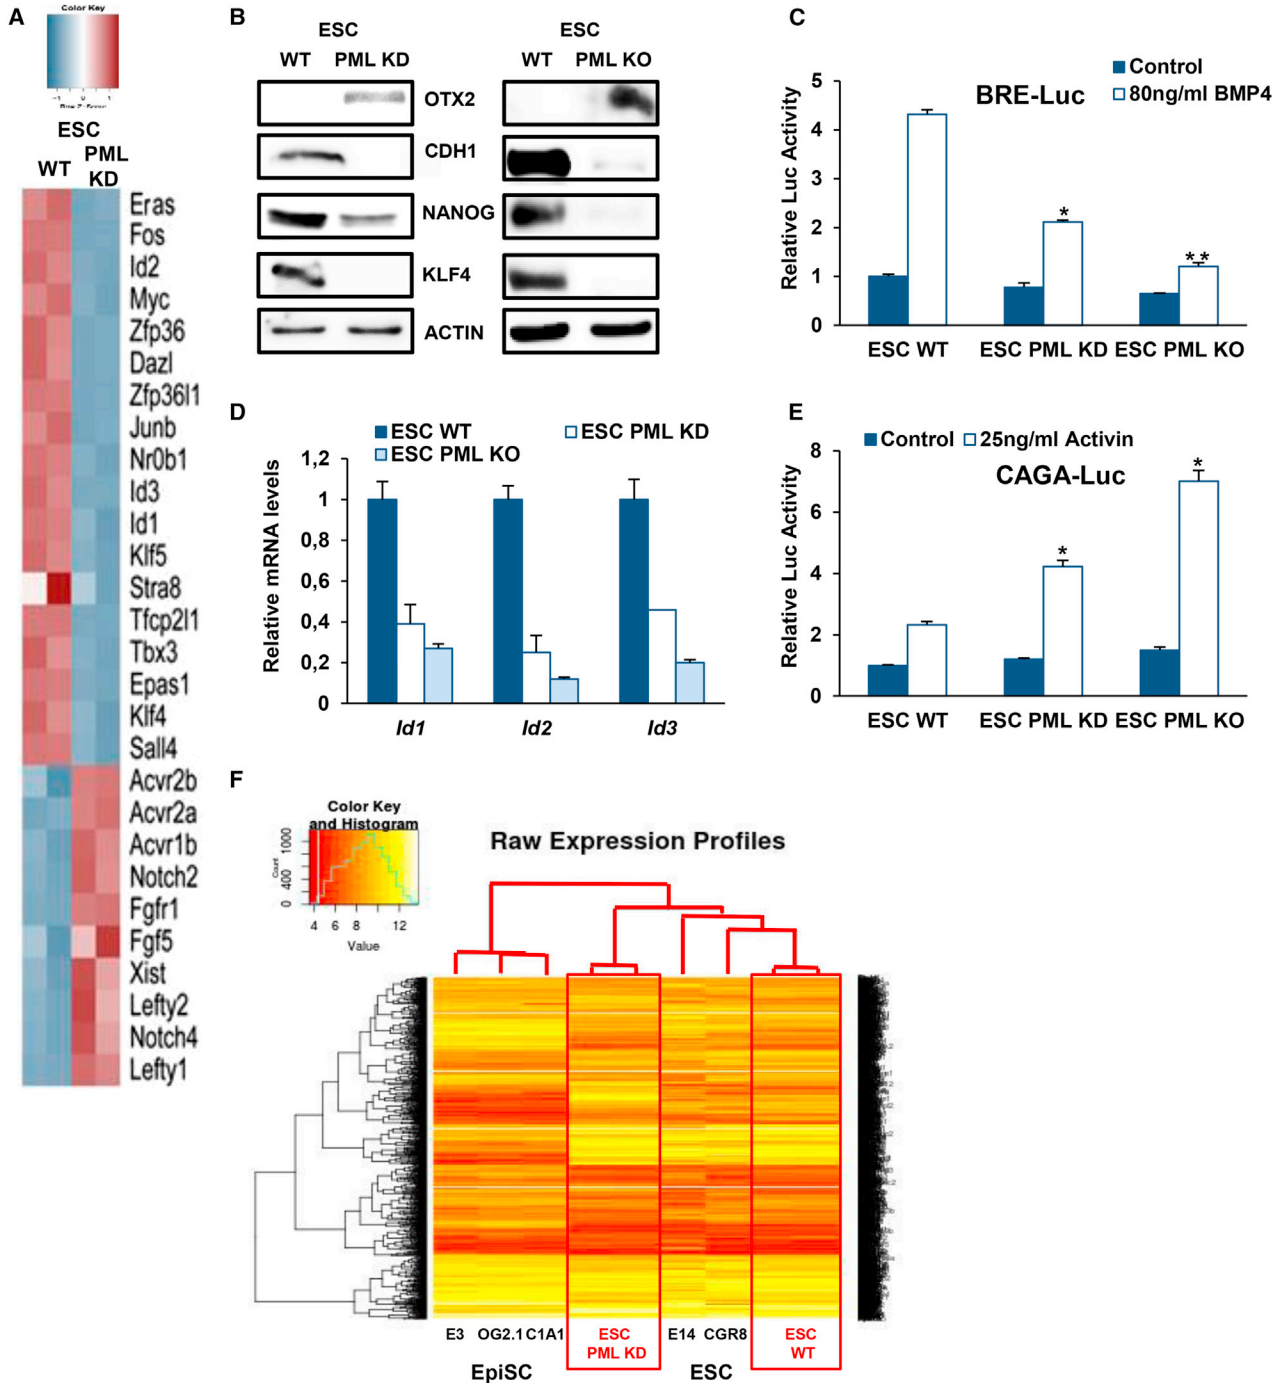

### Figure 2. PML Reduction Promotes an Epi-like Stem Cell State

(A) Heatmap with the top representative naive and primed genes.

(B) OTX2, CDH1, NANOG, and KLF4 protein levels prior to and after PML loss in ESC.

(C) Luciferase activity of BRE-Luc reporter upon PML depletion. Data represent the mean + SD of four independent experiments ( $n = 4$ ). \* $p < 0.05$ , \*\* $p < 0.01$ .

(D) mRNA levels of BMP signaling target genes (*Id1*, *Id2*, *Id3*) in WT, PML KD, and KO ESC. Data are shown as mean + SD of three independent experiments ( $n = 3$ ).

(E) CAGA-Luc reporter activity upon PML ablation. Error bars indicate +SD of four independent experiments ( $n = 4$ ). \* $p < 0.05$ .

(F) Heatmap of the gene expression profiles of our WT and PML KD ESC replicates along with three EpiSC and two ESC lines.

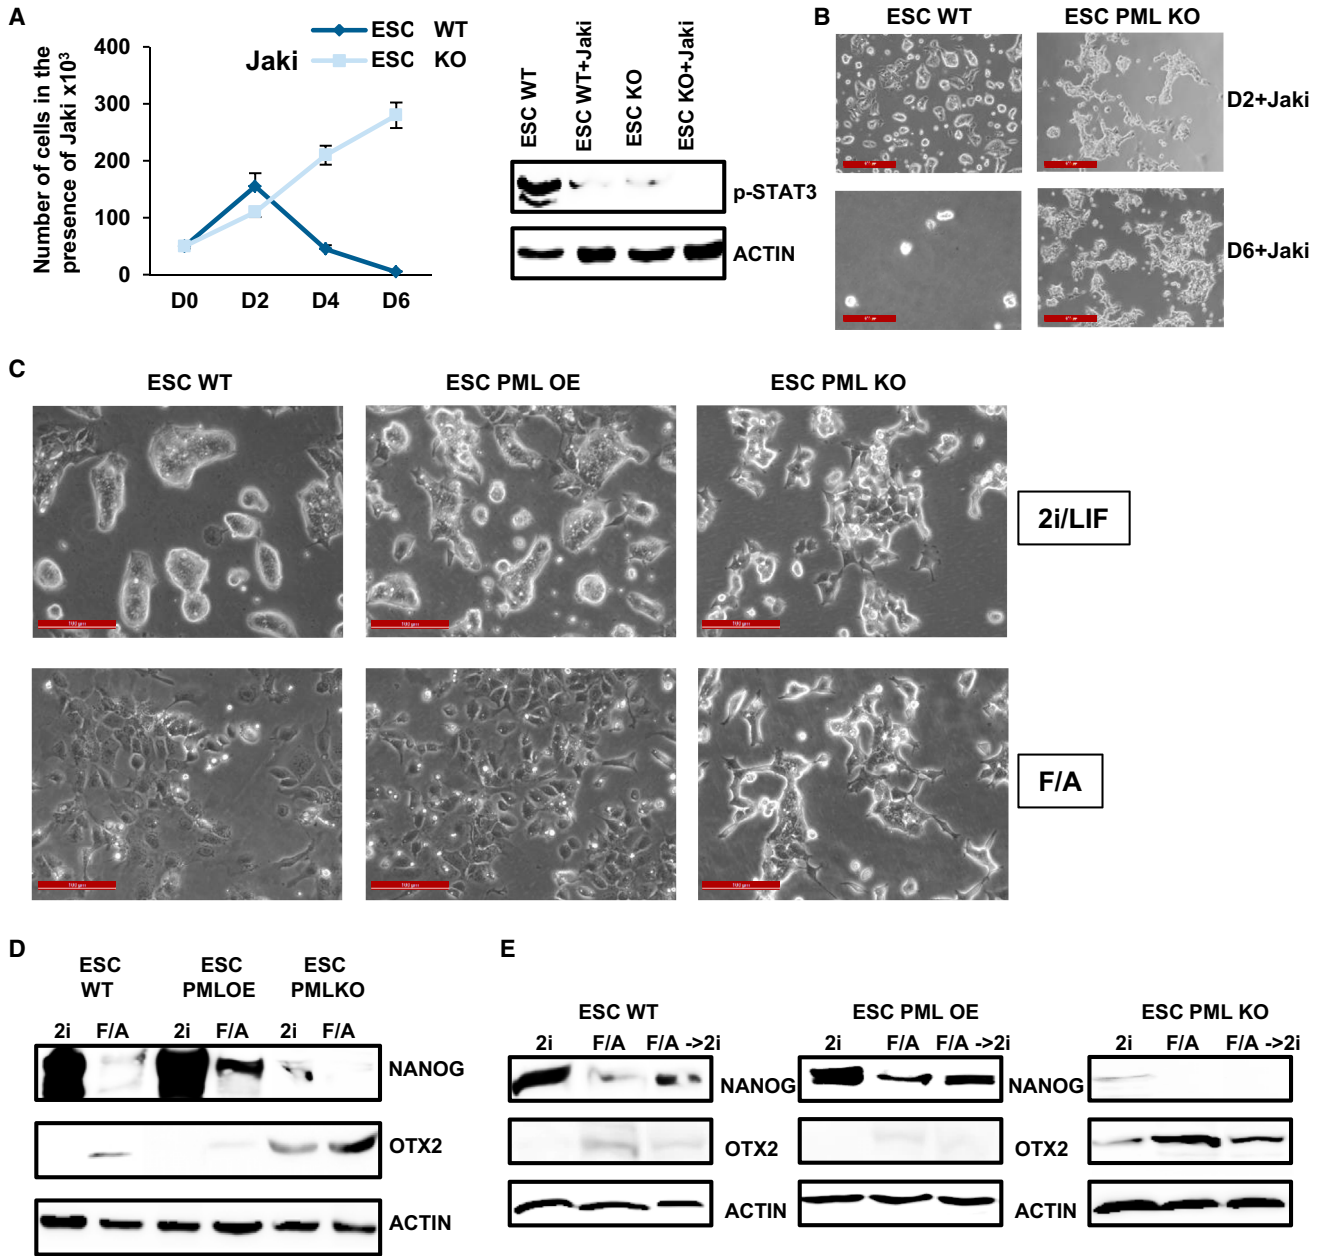

**Figure 3. PML Impedes the Conversion from Naive ESC to EpiSC**

(A) Proliferation of WT and PML KD ESC with or without JAKi. Western blot showing JAKi abrogation of p-STAT3. Data represent the mean  $\pm$  SD of three independent experiments ( $n = 3$ ). D, day.

(B) Morphology of WT and PML KO ESC after 2 and 6 days of JAKi treatment. Scale bars, 100  $\mu$ m. D, day.

(C) WT, PML KO, and PML OE ESC morphology at 6 days under 2i/LIF or F/A culture conditions. Scale bars, 100  $\mu$ m.

(D) NANOG and OTX2 protein levels in WT, PML OE, and PML KO ESC. Cells were cultured either in 2i/LIF or F/A for 6 days.

(E) Western blot analysis of NANOG and OTX2 in WT, PML OE, and PML KO ESC. Cells were cultured in 2i/LIF (6 days), F/A (6 days), and F/A  $\rightarrow$  2i/LIF (6 days F/A plus 6 days 2i/LIF).

remained unchanged (Figure 3C). In control cells, NANOG and *Klf4* were decreased, while OTX2 and *Fgf5* were raised (Figures 3D and S3E). The silencing of PML led to a more pronounced increase of OTX2 and *Fgf5*, while NANOG

and *Klf4* were lower (Figures 3D and S3E). Conversely, PML OE ESC exit from the ground pluripotent state is significantly delayed according to the above markers (Figures 3D and S3E). These results indicate that PML KO cells



are closer to EpiSC than to ESC and that forced expression of PML partially prevents the conversion to EpiSC.

We then examined whether these ESC-derived EpiLSC following propagation (at least three passages) in F/A could be reverted to naive ESC by culturing in 2i/LIF. Molecular marker analysis of PML OE cells, 6 days after this transition, showed an important induction of naive and lessening of primed markers (Figures 3E and S3F). PML KO cells exhibited no significant alterations during this transition (Figures 3E and S3F). Collectively, these data indicated that PML overexpression may favor the reversion from the EpiSC to naive pluripotent state.

### Deregulated Expression Levels of PML Influence Lineage Specifications In Vitro

To study the role of PML in ESC fate decisions, we induced differentiation of PML KD and WT ESC through EB formation and then analyzed the gene expression profile on EB day 4, using cDNA microarray. Upon PML KD ESC differentiation, 836 genes are upregulated (fold change > 1.5,  $p < 0.05$ ) and 400 genes are downregulated (fold change < -1.5,  $p < 0.05$ ) (Figure S4A). Importantly, according to gene ontology (GO) (Figure S4A), PML KD preferentially induces mesodermal and represses endodermal commitment (Figure 4A). The representative differentiation marker levels were also corroborated through RT-PCR and western blot analyses in both PML KD and KO cells (Figures 4B and 4C). In agreement with the above, the reduction of *c-Myc*, *Nr0b1*, and *Nanog* at EB day 4 in PML KD and KO ESC—factors known to inhibit endodermal commitment—is delayed, indicating a facilitation of endodermal differentiation (Figure S4B) (Zhang et al., 2014). Concerning ectodermal differentiation only a few markers show a notable change, the most remarkable being the upregulation of *Nestin* (*Nes*) (Figure 4D). Strikingly, *Pax6*, a well-studied neuroectodermal marker, is, unusually, already expressed in the undifferentiated PML KD and KO ESC (Figure 3D). This derepression is in line with the study by Regad et al. (2009), in which it was demonstrated that PML is essential for the proper transition of neuroblasts to intermediate progenitors. On the contrary, PML OE favors the induction of endoderm (*Afp*) differentiation markers (Figure S4C) and at the same time enhances the suppression of mesodermal (*T*) and ectodermal (*Nes*) markers (Figures S4C). Hence, our data suggest that PML is essential for proper ESC differentiation toward the three germ layers. Specifically, PML promotes endodermal differentiation and limits mesodermal lineages.

A potential molecular mechanism for PML effects on differentiation might be based on the already mentioned suppression of *Tbx3* by PML (Figure 4E). *Tbx3* is regulated by the PI3K signaling pathway and was recently identified as a negative regulator of mesodermal commitment via

targeting Brachyury (*T*) and Wnt pathway genes (*Wnt8a*, *Fzd2*, *Wnt3a*) (Waghray et al., 2015). Consistent with the aforementioned work, we found that *T* and Wnt effectors are overexpressed and induce mesoderm differentiation (Figures 4B and 4E) in PML KD EB. In contrast to the mesodermal lineage commitment, *Tbx3* was previously reported to induce the endodermal differentiation via activation of *Eomes* in collaboration with JMJD3 (Kartikasari et al., 2013). In PML KD ESC, the mRNA of *Eomes* and *Jmjd3* are decreased, in agreement with *Tbx3* reduction and the aforementioned studies, leading to impaired endodermal differentiation (Figure 4E). Moreover, it was also found that TBX3 physically interacts with PML in proliferating cells, reinforcing our assumption that PML mediates its role via *Tbx3* (Martin et al., 2012).

To address this question, we firstly confirmed the physical association of TBX3 and PML proteins by co-immunoprecipitation (not shown) and subsequently by generating stable PML KD ESC lines carrying pcDNA3-HA-TBX3 vector (not shown). During EB differentiation, TBX3 ectopic expression can partially restore the phenotype caused by PML deficiency. In particular, induction of mesodermal lineage specification is reduced while endoderm characteristic markers are elevated (Figure 4F). Taken together, the above results propose that TBX3 is positively regulated by PML and that repression of TBX3 partially accounts for the phenotype observed in PML ablation.

### PML Is Required for Efficient Reprogramming of MEF into iPSC

Since PML is required for ESC self-renewal and pluripotency, we investigated its contribution to the somatic cell reprogramming process. To address this issue, we isolated MEF from PML-deficient mice for iPSC generation. *Pml*<sup>-/-</sup> MEF and WT MEF were reprogrammed with Yamanaka factors (OSKM) and formed iPSC colonies (Takahashi and Yamanaka, 2006). PML deletion greatly decreases the efficiency of reprogramming in terms of total number of colonies (approximately 10-fold lower) and time of appearance (Figure 5A). Next, pluripotency and differentiation properties of the derived iPSC colonies were examined. Interestingly, representative undifferentiated stem cell markers are reduced in *Pml*<sup>-/-</sup> iPSC compared with the WT (Figure 5B) in agreement with PML KD and KO ESC. Unlike WT iPSC, *Pml*<sup>-/-</sup> iPSC express higher levels of developmental genes (*Pax6*, *T*) (Figure S5A). EB formation from PML KO iPSC revealed enhanced mesodermal differentiation at the expense of endodermal commitment (Figure S5B). This phenotype resembles the differentiation potential of PML KD ESC. Finally, we analyzed the pluripotency properties of PML KD iPSC with the in vivo assay of teratoma formation. WT and PML KD iPSC were injected intramuscularly in immunocompromised mice and tumors

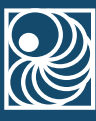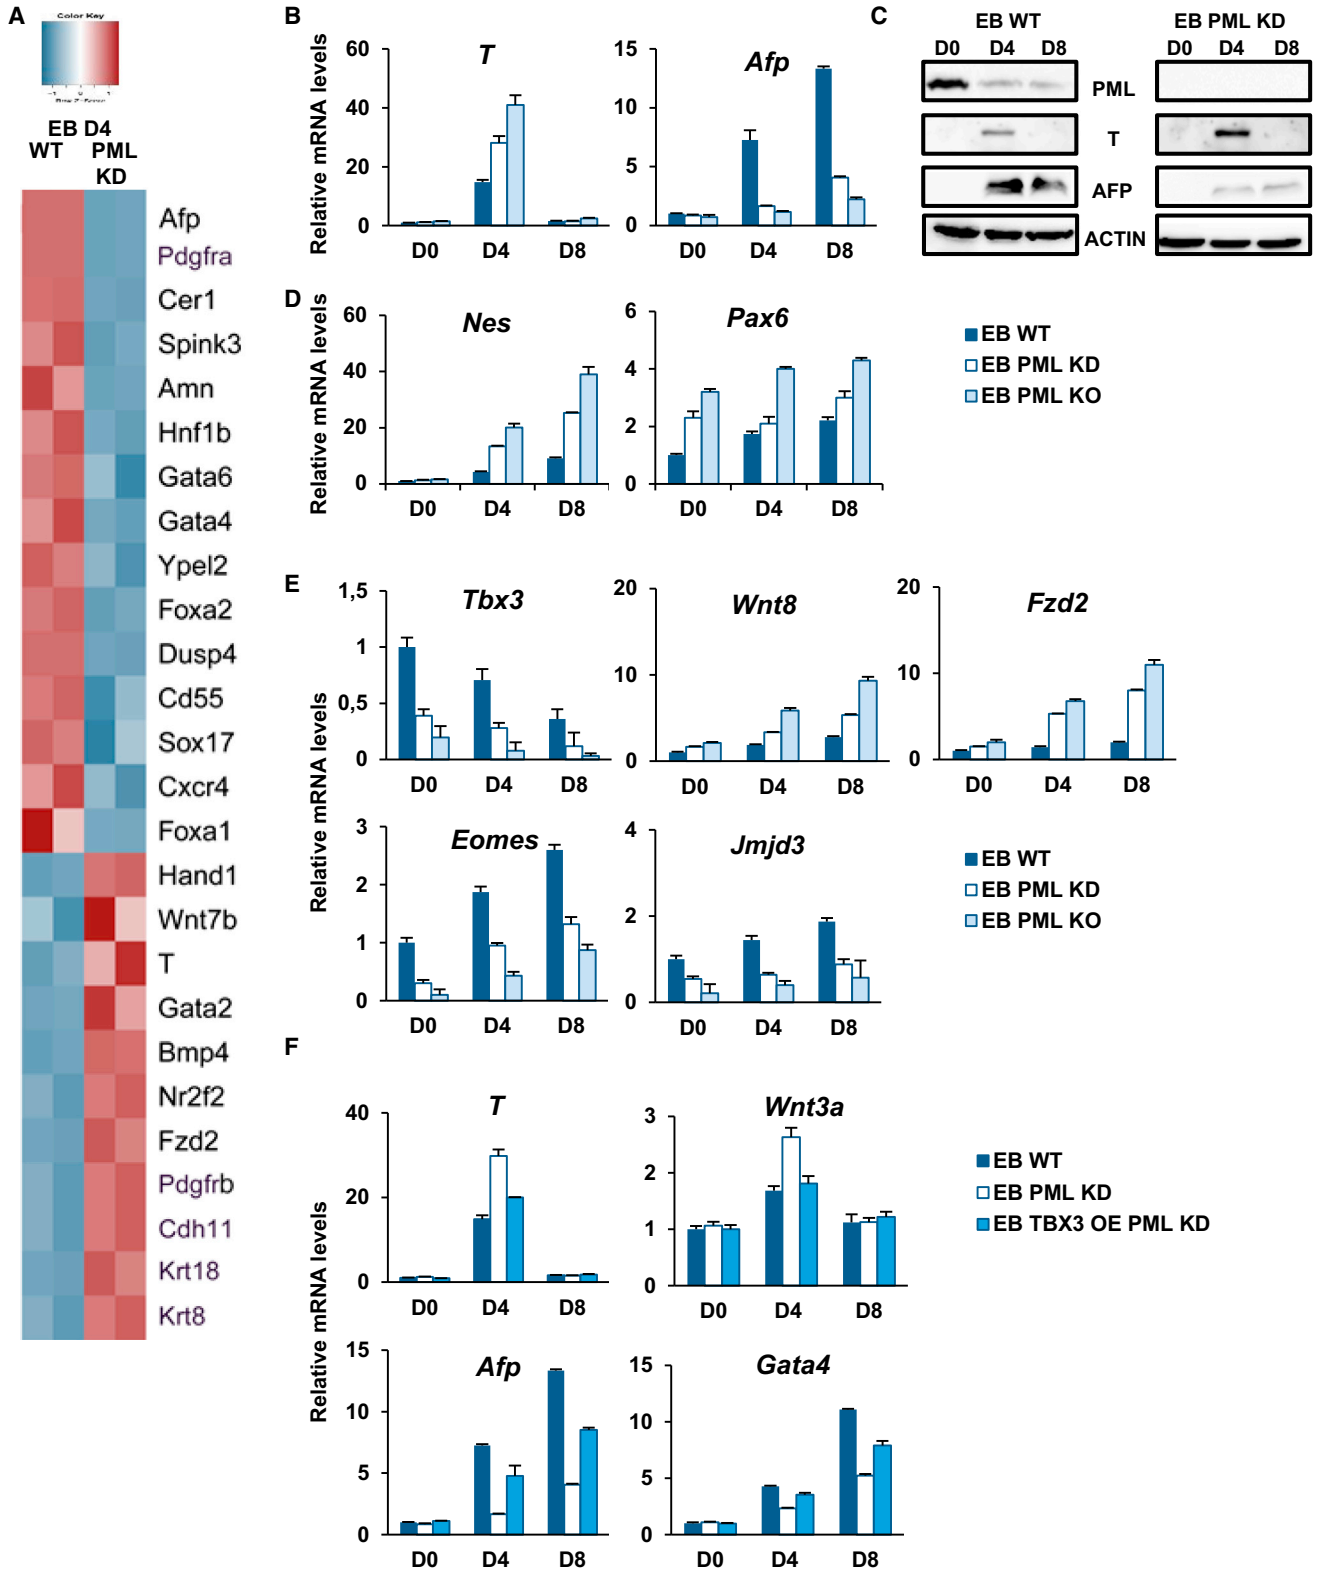

**Figure 4. PML Inhibition Promotes Mesoderm and Represses Endoderm Differentiation**

(A) Heatmap displaying top endodermal genes and mesodermal genes differentially expressed in PML KD and WT EB D4 (fold change > 1.5,  $p < 0.05$ ).

(legend continued on next page)





were isolated 20 days later. The germ-layer composition of the tumors was analyzed by H&E staining. Notably, PML KO iPSC form teratomas of smaller size and with more mature structures in comparison with the control (Figure 5C). This observation suggests that loss of PML impairs the pluripotency of the iPSC.

To specify the time window within which PML is required for the reprogramming process, we infected WT MEF with an OSKM lentiviral vector in combination with shRNA against *Pml*. In agreement with previous experiments, introduction of shPML reduced significantly the number of iPSC colonies compared with control (Figure S5C). PML KD efficiency was traced throughout the experiment and was sustained until day 8 (Figure S5C), supporting a defect in the early stages of reprogramming.

It is well established that reprogramming entails several molecular steps, including mesenchymal to epithelial transition (MET) in the first stage (Samarachi-Tehrani et al., 2010). Although *Pml*<sup>-/-</sup> MEF express significantly lower levels of mesenchymal markers, their epithelial morphological switch at day 12 of reprogramming is defective, as shown by reduced CDH1 and increased ZEB1 and vimentin (VIM) (Figure 5D). On the contrary, WT MEF show a clear MET after OSKM transduction (Figure 5D). In addition, we analyzed the protein levels of OCT4 and NANOG at day 12 and we found that OSKM-transduced WT MEF show higher expression levels of pluripotency markers, in contrast to *Pml*<sup>-/-</sup> MEF (Figure 5D).

A potential mechanism for the interpretation of our data is supported by previous studies that highlight the importance of an epithelial-mesenchymal transition (EMT) that takes place in the early days of reprogramming (Liu et al., 2013; Unternaehrer et al., 2014). To investigate this hypothesis, we verified the temporary EMT in the early phase of reprogramming (days 0–3) shown by the upregulation of mesenchymal markers (ZEB1, VIM) and the presence of p-SMAD2/3. Interestingly, the EMT, as monitored by ZEB1 and p-SMAD2/3, is lower in *Pml*<sup>-/-</sup> MEF (Figure 5E). Thus, we concluded that PML positively contributes to the reprogramming of somatic cells by enhancing EMT at the very early stage.

## DISCUSSION

PSC offer great opportunities for human health, allowing the derivation of patient-specific tissues and providing disease models for drug screening. Thus, investigation of factors and mechanisms that regulate pluripotency constitutes a rapidly growing area of cutting-edge research. In addition to their value for regenerative medicine, pluripotency factors are promising targets to study cancer stem cells, since oncogenic transformation and cellular reprogramming share common properties (Goding et al., 2014; Hadjimichael et al., 2015).

In this report we addressed the functions of the pleiotropic regulator PML in embryonic and induced PSC. PML is highly expressed in undifferentiated ESC and its ablation induces significant changes in ESC morphology, global gene expression profile, and lineage specification decision. Specifically, PML physically interacts and regulates the expression of crucial mediators of pluripotency and contributes to the preservation of self-renewal. Furthermore, PML influences mESC cell-cycle profile, since its depletion leads to prolonged G<sub>1</sub> phase, resembling that of differentiated cells. This effect can be attributed to the inhibition of the pro-proliferative functions of LIF/STAT3 and Myc-elicited mechanisms that we observed in lack of PML expression. In addition, GO analysis of our microarrays data highlighted PI3K pathway-related genes as being strongly downregulated in PML-deficient ESC. PI3K signaling is a well-documented mediator of proliferation, and its reduced activity in PML loss is in agreement with the effect on the ESC cell cycle.

In somatic cells PML inhibits cell proliferation through activation of pRB and p53, and this function highly contributes to its role as a tumor suppressor (Guan and Kao, 2015). These effects are mainly due to the regulation of post-translational modifications including phosphorylation and dephosphorylation by PML bodies. In mESC, pRB is constitutively inactivated by phosphorylation (Aksoy et al., 2007; Coronado et al., 2013; White and Dalton, 2005) and the p53 pathway is not active (Lee et al., 2012). Our data showed that PML is involved in maintaining pRB in an inactive state, and that PML loss impairs

(B) Validation of microarray results using RT-PCR in PML KD, KO, and WT EB. Error bars indicate +SD of four independent experiments (n = 4).

(C) Western blot analysis of PML, T, and  $\alpha$ -fetoprotein (AFP) expression in PML KD and KO compared with WT EB.

(D) *Nes* and *Pax6* mRNA levels upon differentiation of PML KD, KO, or WT ESC. Data are shown as mean + SD of four independent experiments (n = 4).

(E) *Tbx3*, Wnt pathway genes, *Eomes*, and *Jmjd3* mRNA levels upon differentiation of PML KD, KO, or WT ESC. Data represent the mean + SD of three independent experiments (n = 3).

(F) Endodermal (*Afp*, *Gata4*) and mesodermal (*T*, *Wnt3a*) gene expression levels in the course of differentiation of WT, PML KD, and TBX3 OE PML KD ESC. Error bars indicate +SD of four independent experiments (n = 4).

D, day.

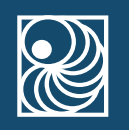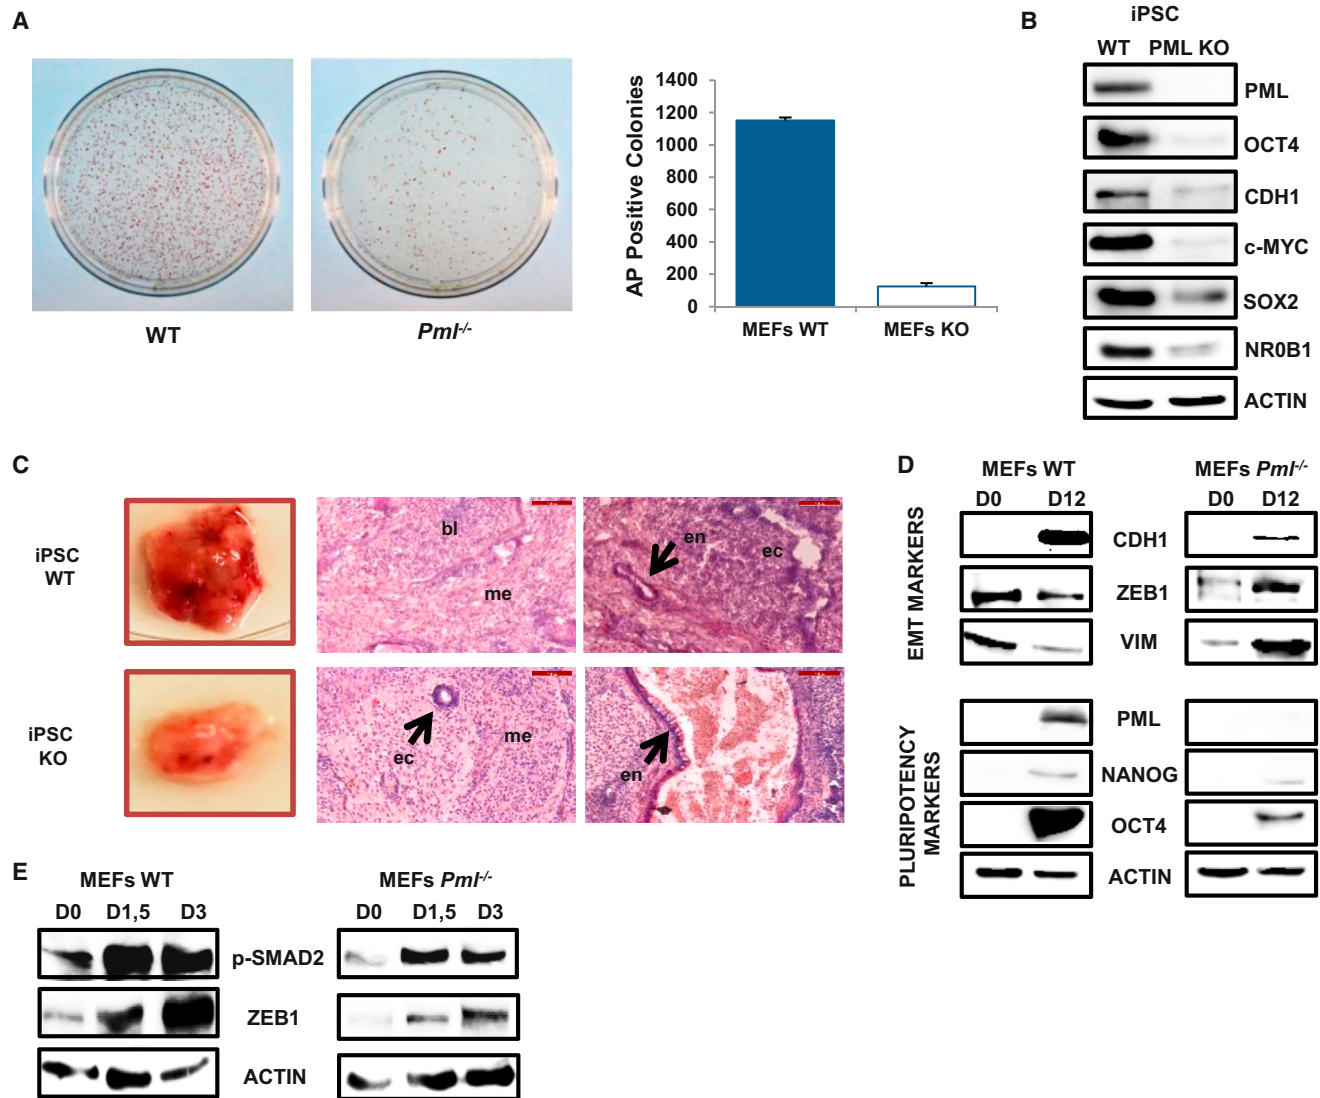

### Figure 5. PML Is Essential for Efficient Reprogramming of MEF to iPSC

(A) Alkaline phosphatase (AP) staining of iPSC colonies 28 days after OSKM lentiviral transduction. AP-positive colony numbers are shown on the right. Data are shown as mean + SD of three independent experiments ( $n = 3$ ).

(B) Protein levels of pluripotency markers in WT and PML KO iPSC.

(C) Teratoma formation by intramuscular injection of WT and PML KO iPSC in immunocompromised mice. Photos show the differences between teratoma size. H&E staining analysis of the three germ layers in teratoma sections demonstrated by the respective arrows (bl, blastema; ec, ectoderm; en, endoderm; me, mesoderm). Scale bars, 100  $\mu\text{m}$ .

(D) Protein expression levels of epithelial, mesenchymal (upper panel), and pluripotency markers (lower panel) at day (D) 12 of reprogramming process.

(E) Protein levels of p-SMAD2 and ZEB1 at days (D) 0, 1.5, and 3 of reprogramming process.

cell-cycle progression and favors advance to the primed-like state.

The effect of PML disruption on ESC transition from the naive to the EpiSC pluripotent state is also underpinned by transcription factor expression, specific signaling pathway deregulation, and metabolic alterations. Our transcriptomic analysis revealed a downregulation of

genes encoding enzymes of FAO and OXPHOS. Thus, PML loss results in decreased respiration and mitochondrial function, another indication for exit from the naive state and progression to the EpiSC state. In addition, *Pml*<sup>-/-</sup> cells sustain propagation in F/A culture conditions and proliferate normally in the presence of Jaki, reinforcing the idea that they move on toward a primed-like stem cell



state. Moreover, PML overexpression delays the exit from the naive state by either permitting long-term existence of a small fraction of undifferentiated naive ESC or allowing a fraction of EpiSC to regain the naive pluripotent state. These data propose that PML safeguards the naive pluripotent state.

PML is also implicated in the differentiation process. PML ablation stirred ESC toward mesodermal rather than endodermal lineage commitment through *Tbx3* repression. *Tbx3*, well-known downstream target of the PI3K signaling pathway, is one of the most significantly repressed genes upon PML KD. Forced expression of TBX3 in PML KD ESC rescued the differentiation changes caused by PML loss. Physical interaction and reciprocal inhibition between TBX2/3 and PML was previously shown in human fibroblasts where the pro-senescence activity of PML counteracted cell proliferation driven by TBX (Martin et al., 2012). However, in ESC, TBX3 is positively regulated by PML and determines cell differentiation choices.

Finally, we demonstrate here that PML promotes iPSC generation by facilitating the early activation steps. Our proposed model for its contribution to reprogramming is that PML activates mesenchymal marker activation (EMT), which in turn enhances epithelial (MET) and pluripotent gene activation, resulting in an increase of reprogramming efficiency. In agreement with recent publications (Liu et al., 2013), we detect an initial EMT step in the reprogramming process that is compromised by PML loss. Additionally it is well established that PML is a crucial regulator of transforming growth factor  $\beta$  (TGF- $\beta$ ) signaling, since *Pml*<sup>-/-</sup> MEF showed a significant reduction of p-Smad2/3 and impaired expression of TGF- $\beta$  target genes including mesenchymal-specific genes (Lin et al., 2004). Consequently, *Pml*<sup>-/-</sup> iPSC showed reduced pluripotency as manifested by the generation of smaller and more differentiated teratomas. This effect may be also attributed to telomere dysfunction that was reported in PML KD ESC (Chang et al., 2013). Functional telomeres are essential for pluripotency, and telomere shortening causes impaired teratoma formation (Huang et al., 2011).

Collectively, we present evidence that PML preserves mESC naive pluripotency and facilitates the reprogramming ability of mouse fibroblasts. This action may be related to the recently described pro-survival action of PML in breast cancer (Carracedo et al., 2012) and the involvement of PML in cancer stem cell maintenance in leukemia (Ito et al., 2008) and glioma (Zhou et al., 2015).

Our current results designate PML as a general regulator of cell fate and stemness that may have a broad impact on the exploration of PSC maintenance and differentiation, as well as on novel ways to target oncogenic processes.

## EXPERIMENTAL PROCEDURES

### Cell Culture

The murine feeder-independent ESC line CGR8 was cultured in gelatin-coated flasks in DMEM (Gibco) supplemented with 100 U/mL LIF (ESGRO-Millipore), 2 mM L-glutamine (Gibco), 2 mM non-essential amino acids (Gibco), 0.1 mM  $\beta$ -mercaptoethanol (Gibco) and 15% heat-inactivated HyClone FBS (GE Healthcare Life Sciences). For EB formation, cells were trypsinized and diluted in Iscove's modified Dulbecco's medium (Gibco) supplemented with 2 mM L-glutamine (Gibco), 2 mM non-essential amino acids (Gibco), 0.1 mM  $\beta$ -mercaptoethanol (Gibco), and 20% heat-inactivated HyClone FBS (GE Healthcare Life Sciences), to a final concentration of 1,000 cells/20  $\mu$ L. EBs were cultured without LIF as hanging drops for 2 days and subsequently collected and cultured in suspension for 6 additional days.

### Generation of PML KD or OE ESC Stable Cell Lines

The generation of stably expressing PML shRNA ESC lines was achieved using PML shRNA-pLKO.1 lentiviral vector provided by Prof. Z.D. Levy of the Open University of Israel. In brief, CGR8 cells were grown to 80% confluence and infected with the lentiviruses produced either by the empty shRNA or PML shRNA vector, for 72 hr. Selection of shRNA infected cells was achieved with puromycin (2  $\mu$ g/mL). A total of 60 isolated resistant colonies, evident after 2–4 weeks, were picked and further grown for screening. Puromycin-resistant clones were examined using western blot and qPCR. Respectively, PML OE ESC lines were generated using PML-IRES-GFP construct or IRES-GFP as a negative control. The isolation of the clones was performed using G418 (300  $\mu$ g/mL).

### Isolation of PML KO ESC

PML KO ESC were isolated from B57BL/6 *Pml*<sup>-/-</sup> mice. Female mice were euthanized at E3.5 stage and their uteri were immediately separated into 10 mL of DMEM on 100-mm plates. Uteri were then transferred into 2 mL of DMEM in a 35-mm dish and the blastocysts were flushed out using a 1-mL syringe. Blastocysts were collected under an inverted microscope using a 20-mL pipette and transferred to a 48-well plate containing a feeder layer of MEF mitotically inactivated 1 day earlier. After 2–3 days, blastocysts attached to the MEF feeder layer and hatched. ES medium was changed every second day while the expanded blastocysts adopted a morphology comparable with ESC (usually on day 5 or 6).

### cDNA Microarray Analysis

Total RNA was extracted from PML KD and WT ESC cell lines at D0 and D4 of EB differentiation using an RNeasy Microarray Tissue Mini Kit (Qiagen). The RNA was then analyzed using Affymetrix GeneChip Mouse Gene ST 1.0 array, according the manufacturer's instructions. Microarray data were processed to extract the representative intensities from each probe set using Affymetrix Transcriptome Analysis Console software. Fold change >1.5 and  $p < 0.05$  were used to identify differential expression between the sample groups. Prior to hierarchical clustering,  $\log_2$  transformation was performed. Functional analysis was performed using RNEA (Chouvardas et al., 2016). The value  $p < 0.05$  was employed for both significantly enriched GO terms and KEGG pathways.

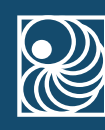

## iPSC Formation

Primary MEF were isolated either from C57BL/6 WT or Pml<sup>-/-</sup> mice at E13.5. For iPSC generation, MEF WT or PML KO (passage 1 or 2) were plated at 0.4–0.5 × 10<sup>6</sup> cells in a 100-mm plate and incubated overnight. The following day, cells were infected with the lentiviruses produced by TetO-FUW-OSKM (Addgene #20342) and FUW-M2rtTA vectors (Addgene #20342), for 48 hr. After 2 days, cells were reseeded on feeders and treated with 2 μg/mL doxycycline in mESC medium for induction of Yamanaka's factors. The medium was changed every other day. iPSC colonies appeared 9–11 days post infection. Alkaline phosphatase staining was performed using an Alkaline Phosphatase Detection Kit (Millipore) according to the manufacturer's instructions.

## Teratoma Formation

PML KO or WT iPSC were harvested using 1 × trypsin and centrifuged at 1,200 × g for 5 min. Cells were then resuspended in 1 × PBS to a final concentration of 2 × 10<sup>6</sup> cells/100 μL and injected intramuscularly into 6- to 8-week-old male NOD-SCID mice (100 μL per mouse). The mice were monitored every day. Teratomas arose between 2 and 3 weeks after engraftment.

## Ethical Approval for the Use of Animals

All experiments were conducted in accordance with the Laboratory Animal Care and Ethics Committee of IMBB. Animal work was approved by the IMBB Institutional Animal Care and Ethics Committee.

## Statistical Analyses

Student's t test was used for all statistical analyses. Statistical significance was defined in the figures as follows: \*p < 0.05, \*\*p < 0.01. Values are presented as the mean ± SD.

## ACCESSION NUMBERS

The accession number of microarray data reported in this article is GEO: GSE93922.

## SUPPLEMENTAL INFORMATION

Supplemental Information includes Supplemental Experimental Procedures and five figures and can be found with this article online at <http://dx.doi.org/10.1016/j.stemcr.2017.03.006>.

## AUTHOR CONTRIBUTIONS

C.H. designed and performed experiments, data analysis, discussion, and writing; K.C., G.I.T., and T.M. contributed to the experimental work and discussion; A. Klonizakis and C.N. performed microarrays analysis; J.P. contributed to discussion and writing; A. Kretsovali supervised the study and contributed to writing.

## ACKNOWLEDGMENTS

We would like to thank G. Vretzos and D. Tsoukatou for technical assistance, as well as D. Vassou for her contribution in gene expression profiling (IMBB), E. Deligianni for her involvement in TMRE-stained figures analysis, T. Kosteas for help with the isolation of mouse blastocysts, and Prof. C. Spilianakis for critical suggestions.

We also thank Prof. N. Tavernarakis for providing reagents for monitoring oxygen consumption and mitochondria function. This work was funded by Thalys-MIS380247-MIREG (NSRF 2007-2013), Umbistem 11SYN\_10\_668, Fondation Sante, "PROGRAMMATIC AGREEMENTS BETWEEN RESEARCH CENTRES – GSRT 2015-2017" (SIEMENS Biology Activity -Biophotonics) and IMBB internal funding.

Received: August 9, 2016

Revised: March 6, 2017

Accepted: March 7, 2017

Published: April 6, 2017

## REFERENCES

- Acampora, D., Di Giovannantonio, L.G., and Simeone, A. (2013). Otx2 is an intrinsic determinant of the embryonic stem cell state and is required for transition to a stable epiblast stem cell condition. *Development* *140*, 43–55.
- Aksoy, I., Sakabedoyan, C., Bourillot, P.Y., Malashicheva, A.B., Mancip, J., Knoblauch, K., Afanassieff, M., and Savatier, P. (2007). Self-renewal of murine embryonic stem cells is supported by the serine/threonine kinases Pim-1 and Pim-3. *Stem Cells* *25*, 2996–3004.
- Carracedo, A., Weiss, D., Leliaert, A.K., Bhasin, M., de Boer, V.C., Laurent, G., Adams, A.C., Sundvall, M., Song, S.J., Ito, K., et al. (2012). A metabolic pro-survival role for PML in breast cancer. *J. Clin. Invest.* *122*, 3088–3100.
- Chang, F.T., McGhie, J.D., Chan, F.L., Tang, M.C., Anderson, M.A., Mann, J.R., Andy Choo, K.H., and Wong, L.H. (2013). PML bodies provide an important platform for the maintenance of telomeric chromatin integrity in embryonic stem cells. *Nucleic Acids Res.* *41*, 4447–4458.
- Chenoweth, J.G., McKay, R.D., and Tesar, P.J. (2010). Epiblast stem cells contribute new insight into pluripotency and gastrulation. *Dev. Growth Differ.* *52*, 293–301.
- Chouvardas, P., Kollias, G., and Nikolaou, C. (2016). Inferring active regulatory networks from gene expression data using a combination of prior knowledge and enrichment analysis. *BMC Bioinformatics* *17*, 181.
- Chuang, Y.S., Huang, W.H., Park, S.W., Persaud, S.D., Hung, C.H., Ho, P.C., and Wei, L.N. (2011). Promyelocytic leukemia protein in retinoic acid-induced chromatin remodeling of Oct4 gene promoter. *Stem Cells* *29*, 660–669.
- Coronado, D., Godet, M., Bourillot, P.Y., Tapponnier, Y., Bernat, A., Petit, M., Afanassieff, M., Markossian, S., Malashicheva, A., Iacone, R., et al. (2013). A short G1 phase is an intrinsic determinant of naive embryonic stem cell pluripotency. *Stem Cell Res.* *10*, 118–131.
- Goding, C.R., Pei, D., and Lu, X. (2014). Cancer: pathological nuclear reprogramming? *Nat. Rev. Cancer* *14*, 568–573.
- Guan, D., and Kao, H.Y. (2015). The function, regulation and therapeutic implications of the tumor suppressor protein, PML. *Cell Biosci.* *5*, 60.
- Hadjimichael, C., Chanoumidou, K., Papadopoulou, N., Arampatzis, P., Papamatheakis, J., and Kretsovali, A. (2015). Common



- stemness regulators of embryonic and cancer stem cells. *World J. Stem Cells* 7, 1150–1184.
- Huang, J., Wang, F., Okuka, M., Liu, N., Ji, G., Ye, X., Zuo, B., Li, M., Liang, P., Ge, W.W., et al. (2011). Association of telomere length with authentic pluripotency of ES/iPS cells. *Cell Res.* 21, 779–792.
- Ito, K., Bernardi, R., Morotti, A., Matsuoka, S., Saglio, G., Ikeda, Y., Rosenblatt, J., Avigan, D.E., Teruya-Feldstein, J., and Pandolfi, P.P. (2008). PML targeting eradicates quiescent leukaemia-initiating cells. *Nature* 453, 1072–1078.
- Ito, K., Carracedo, A., Weiss, D., Arai, F., Ala, U., Avigan, D.E., Schafer, Z.T., Evans, R.M., Suda, T., Lee, C.H., et al. (2012). A PML-PPAR-delta pathway for fatty acid oxidation regulates hematopoietic stem cell maintenance. *Nat. Med.* 18, 1350–1358.
- Karantzali, E., Schulz, H., Hummel, O., Hubner, N., Hatzopoulos, A., and Kretsovali, A. (2008). Histone deacetylase inhibition accelerates the early events of stem cell differentiation: transcriptomic and epigenetic analysis. *Genome Biol.* 9, R65.
- Kartikasari, A.E., Zhou, J.X., Kanji, M.S., Chan, D.N., Sinha, A., Grapin-Botton, A., Magnuson, M.A., Lowry, W.E., and Bhushan, A. (2013). The histone demethylase Jmjd3 sequentially associates with the transcription factors Tbx3 and Eomes to drive endoderm differentiation. *EMBO J.* 32, 1393–1408.
- Lee, D.F., Su, J., Ang, Y.S., Carvajal-Vergara, X., Mulero-Navarro, S., Pereira, C.F., Gingold, J., Wang, H.L., Zhao, R., Sevilla, A., et al. (2012). Regulation of embryonic and induced pluripotency by aurora kinase-p53 signaling. *Cell Stem Cell* 11, 179–194.
- Liang, J., Wan, M., Zhang, Y., Gu, P., Xin, H., Jung, S.Y., Qin, J., Wong, J., Cooney, A.J., Liu, D., et al. (2008). Nanog and Oct4 associate with unique transcriptional repression complexes in embryonic stem cells. *Nat. Cell Biol.* 10, 731–739.
- Lin, H.K., Bergmann, S., and Pandolfi, P.P. (2004). Cytoplasmic PML function in TGF-beta signalling. *Nature* 431, 205–211.
- Liu, X., Sun, H., Qi, J., Wang, L., He, S., Liu, J., Feng, C., Chen, C., Li, W., Guo, Y., et al. (2013). Sequential introduction of reprogramming factors reveals a time-sensitive requirement for individual factors and a sequential EMT-MET mechanism for optimal reprogramming. *Nat. Cell Biol.* 15, 829–838.
- Martin, N., Benhamed, M., Nacerddine, K., Demarque, M.D., van Lohuizen, M., Dejean, A., and Bischof, O. (2012). Physical and functional interaction between PML and TBX2 in the establishment of cellular senescence. *EMBO J.* 31, 95–109.
- Murayama, H., Masaki, H., Sato, H., Hayama, T., Yamaguchi, T., and Nakauchi, H. (2015). Successful reprogramming of epiblast stem cells by blocking nuclear localization of beta-catenin. *Stem Cell Rep.* 4, 103–113.
- Nakahara, F., Weiss, C.N., and Ito, K. (2014). The role of PML in hematopoietic and leukemic stem cell maintenance. *Int. J. Hematol.* 100, 18–26.
- Regad, T., Bellodi, C., Nicotera, P., and Salomoni, P. (2009). The tumor suppressor Pml regulates cell fate in the developing neocortex. *Nat. Neurosci.* 12, 132–140.
- Sage, J. (2012). The retinoblastoma tumor suppressor and stem cell biology. *Genes Dev.* 26, 1409–1420.
- Samavarchi-Tehrani, P., Golipour, A., David, L., Sung, H.K., Beyer, T.A., Datti, A., Woltjen, K., Nagy, A., and Wrana, J.L. (2010). Functional genomics reveals a BMP-driven mesenchymal-to-epithelial transition in the initiation of somatic cell reprogramming. *Cell Stem Cell* 7, 64–77.
- Savatie, P., and Malashicheva, A. (2004). Cell-cycle control in embryonic stem cells. In *Handbook of Stem Cells*, vol. 1, R. Lanza, J. Gearhart, B. Hogan, D. Melton, R. Pedersen, J. Thomson, and M. West, eds. (2004). (Elsevier Academic), pp. 53–62.
- Singh, A.M., Sun, Y., Li, L., Zhang, W., Wu, T., Zhao, S., Qin, Z., and Dalton, S. (2015). Cell-cycle control of bivalent epigenetic domains regulates the exit from pluripotency. *Stem Cell Rep.* 5, 323–336.
- Takahashi, K., and Yamanaka, S. (2006). Induction of pluripotent stem cells from mouse embryonic and adult fibroblast cultures by defined factors. *Cell* 126, 663–676.
- Tang, M.K., Liang, Y.J., Chan, J.Y., Wong, S.W., Chen, E., Yao, Y., Gan, J., Xiao, L., Leung, H.C., Kung, H.F., et al. (2013). Promyelocytic leukemia (PML) protein plays important roles in regulating cell adhesion, morphology, proliferation and migration. *PLoS One* 8, e59477.
- Unternaehrer, J.J., Zhao, R., Kim, K., Cesana, M., Powers, J.T., Ratanasirintra-woot, S., Onder, T., Shibue, T., Weinberg, R.A., and Daley, G.Q. (2014). The epithelial-mesenchymal transition factor SNAIL paradoxically enhances reprogramming. *Stem Cell Rep.* 3, 691–698.
- Waghray, A., Saiz, N., Jayaprakash, A.D., Freire, A.G., Papatsenko, D., Pereira, C.F., Lee, D.F., Brosh, R., Chang, B., Darr, H., et al. (2015). Tbx3 controls Dppa3 levels and exit from pluripotency toward Mesoderm. *Stem Cell Rep.* 5, 97–110.
- White, J., and Dalton, S. (2005). Cell cycle control of embryonic stem cells. *Stem Cell Rev.* 1, 131–138.
- Zhang, J., Liu, G., Ruan, Y., Wang, J., Zhao, K., Wan, Y., Liu, B., Zheng, H., Peng, T., Wu, W., et al. (2014). Dax1 and Nanog act in parallel to stabilize mouse embryonic stem cells and induced pluripotency. *Nat. Commun.* 5, 5042.
- Zhou, W., Choi, M., Margineantu, D., Margaretha, L., Hesson, J., Cavanaugh, C., Blau, C.A., Horwitz, M.S., Hockenbery, D., Ware, C., et al. (2012). HIF1alpha induced switch from bivalent to exclusively glycolytic metabolism during ESC-to-EpiSC/hESC transition. *EMBO J.* 31, 2103–2116.
- Zhou, W., Cheng, L., Shi, Y., Ke, S.Q., Huang, Z., Fang, X., Chu, C.W., Xie, Q., Bian, X.W., Rich, J.N., et al. (2015). Arsenic trioxide disrupts glioma stem cells via promoting PML degradation to inhibit tumor growth. *Oncotarget* 6, 37300–37315.

**Stem Cell Reports, Volume 8**

**Supplemental Information**

**Promyelocytic Leukemia Protein Is an Essential Regulator of Stem Cell  
Pluripotency and Somatic Cell Reprogramming**

**Christiana Hadjimichael, Konstantina Chanoumidou, Christoforos Nikolaou, Antonios  
Klonizakis, Gesthimani-Ioanna Theodosi, Takis Makatounakis, Joseph  
Papamatheakis, and Androniki Kretsovali**

Supplemental Data

I. Supplemental Figures and Figures Legends

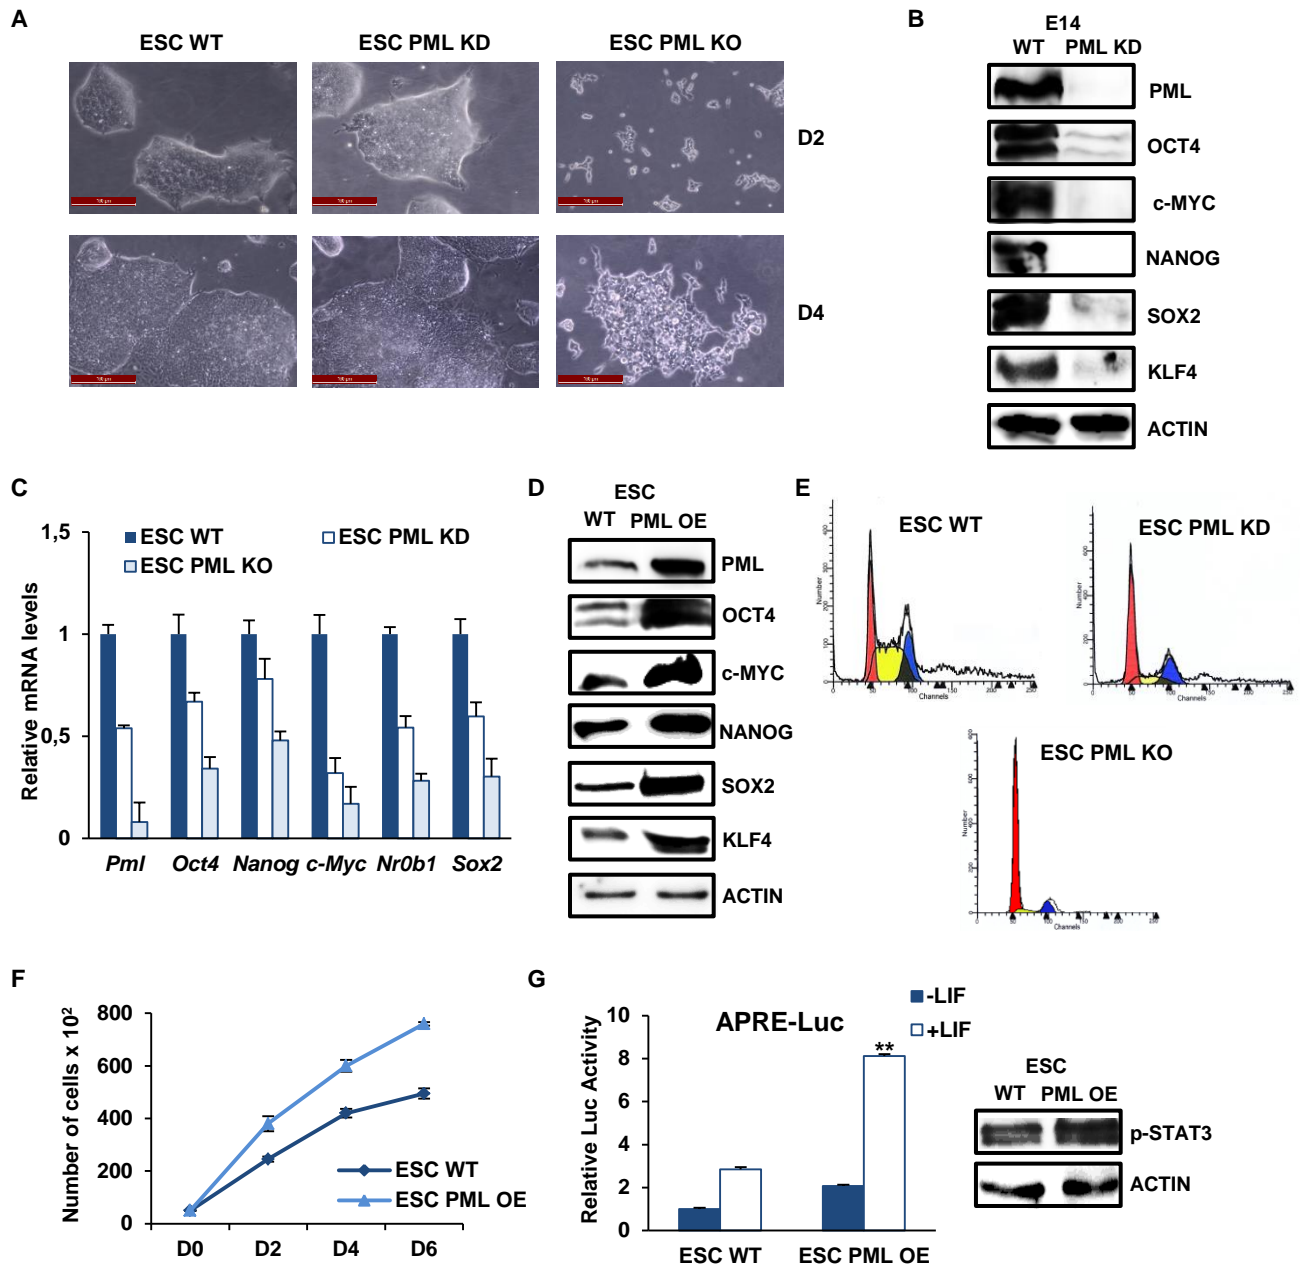

**Figure S1 (related to Figure 1): PML is required for self-renewal and pluripotency of ESC.** **A.** WT, PML KD and KO ESC colonies after 2 and 4 days in culture. Scale bar, 100 $\mu$ m. **B.** Pluripotency factors protein levels upon depletion of PML in E14 cell line. **C.** Relative mRNA levels of pluripotency factors in WT, PML KD and KO ESC. Error bars indicate +SD in three independent experiments (n=3). **E.** Cell cycle phase distribution of WT, PML KD and KO ESC. **F.** Growth curve of WT and PML OE ESC. Data represent the mean +/- SD of four independent experiments (n=4). **G.** The activity of APRE-Luc and p-STAT3 protein expression levels in ESC WT and PML OE ESC. Data represent the mean + SD of four independent experiments (n=4), \* p<0,05.

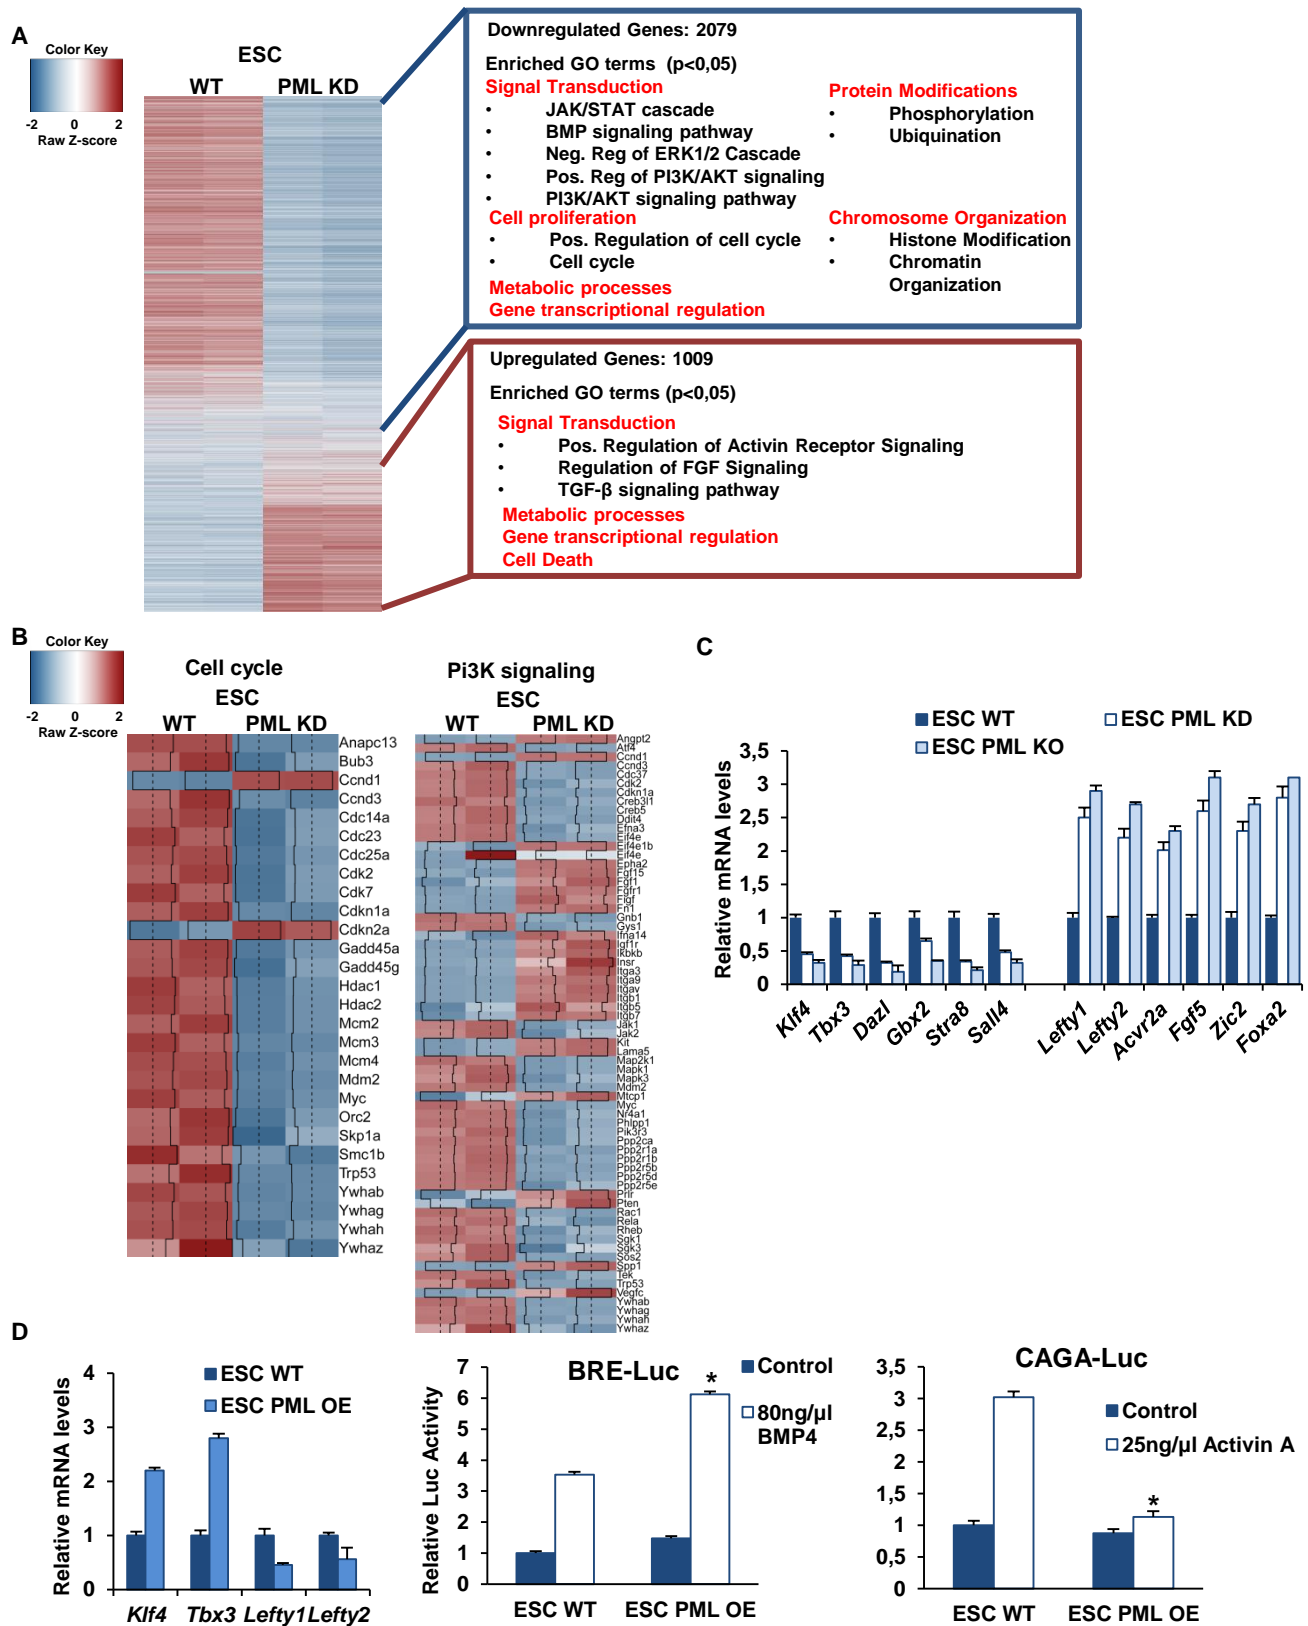

**Figure S2 (related to Figure 2): Genome wide analysis from PML WT and PML KD ESC** **A.** Heat map representing differential expression of genes in PML KD ESC compared to ESC WT. GO analysis was performed using RNEA software. Representative enriched terms were also shown. **B.** Heat map with the top representative cell-cycle (left panel) and pi3K signaling pathway (right panel) related genes. **C.** Relative mRNA levels of characteristic naïve and primed genes in PML KD, PML KO and control ESCs. Error bars indicate +SD of four independent experiments (n=4). **D.** Naïve and primed pluripotency factors expression levels in PML OE ESC cell line (left panel). BRE-Luc and CAGA-Luc reporters activity upon PML enforced expression (right panel). Data are shown as mean +SD of three independent experiments (n=3), p\* < 0,05.



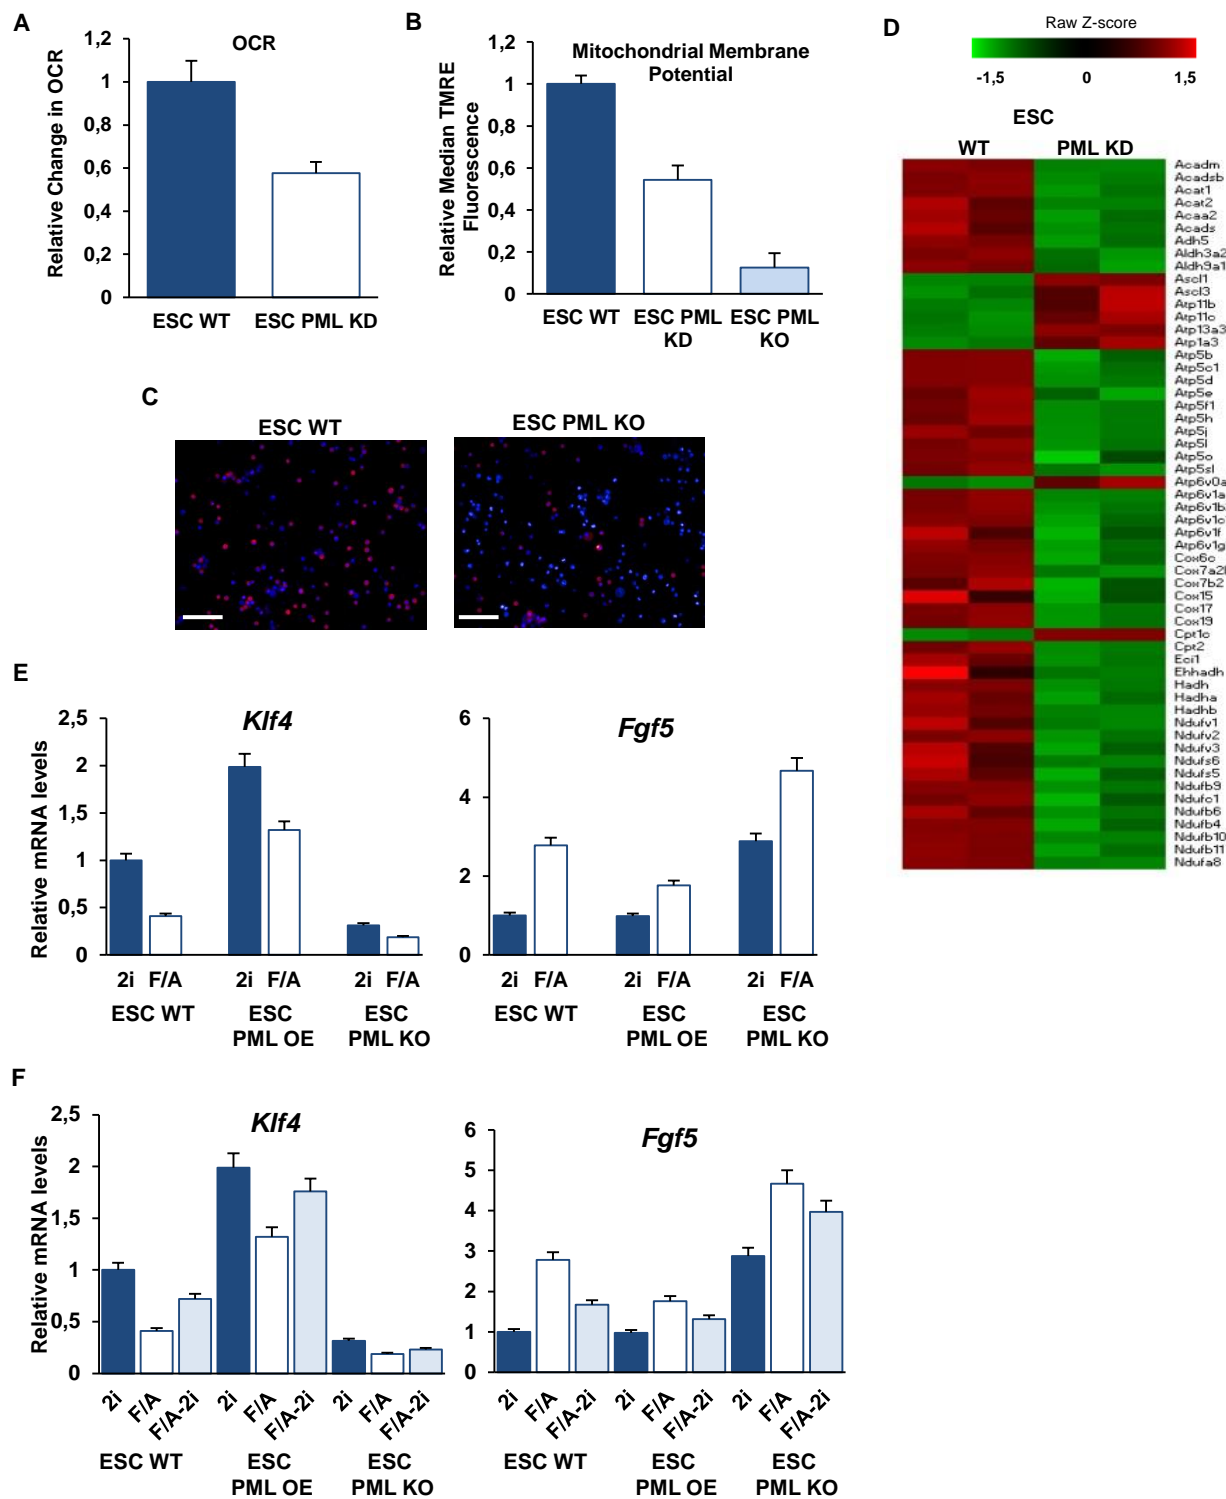

**Figure S3 (related to Figures 2 & 3): PML is essential for naïve pluripotent state maintenance** **A.** Oxygen Consumption Rate (OCR) measured in WT and PML KD ESC. **B.** Mitochondrial membrane potential of WT, PML KD and KO ESC measured by TMRE. Error bars indicate +SD of four independent experiments (n=4). **C.** Fluorescence images of TMRE incubated with WT and PML KO ESC. Scale bar, 50µm. **D.** Heat map showing OXPHOS and FAO related genes expression in WT and PML KD ESC. **E.** Relative mRNA levels of *Klf4* and *Fgf5* in WT, PML OE and PML KO ESC. Cells were cultured either in 2i/LIF or F/A for 6 days. **F.** RT-PCR analysis of *Klf4* and *Fgf5* in WT, PML OE and PML KO ESC. Cells were culture in: 2i/LIF (6 days), F/A (6 days) and F/A→ 2i/LIF (6 days F/A plus 6 days 2i/LIF).

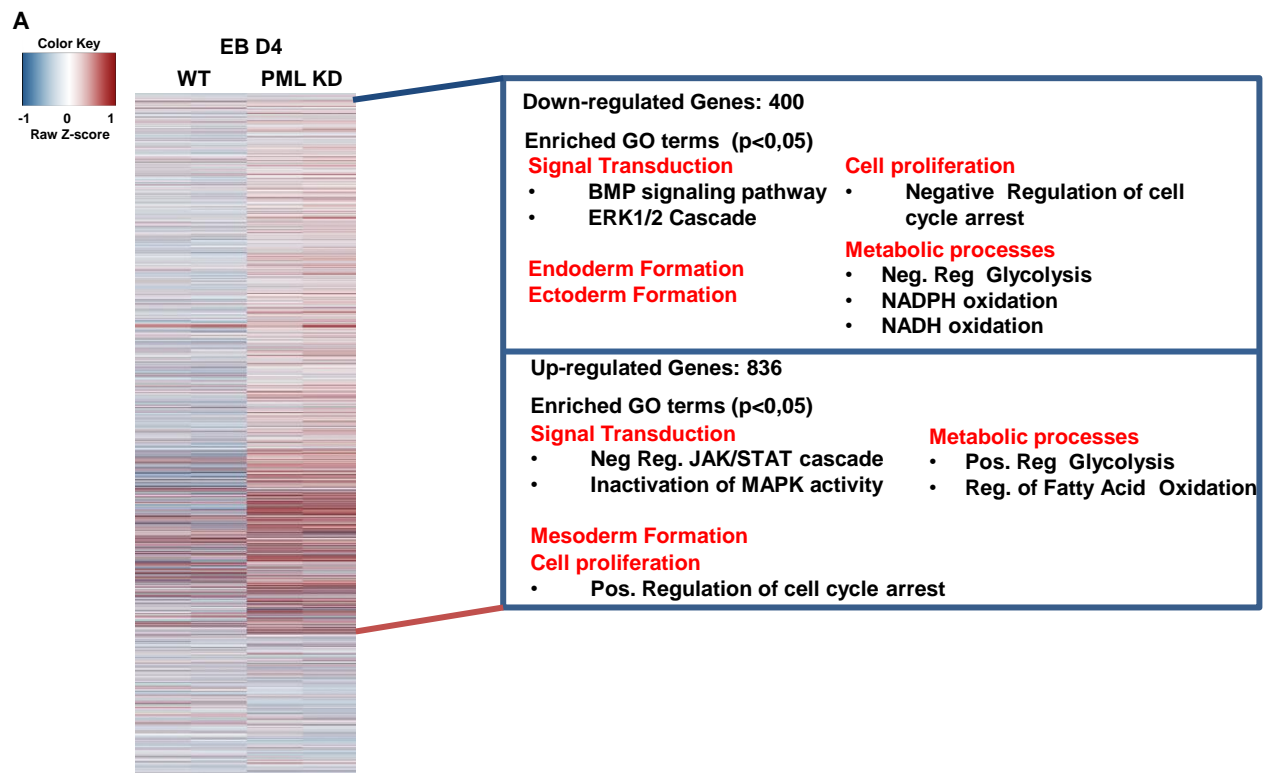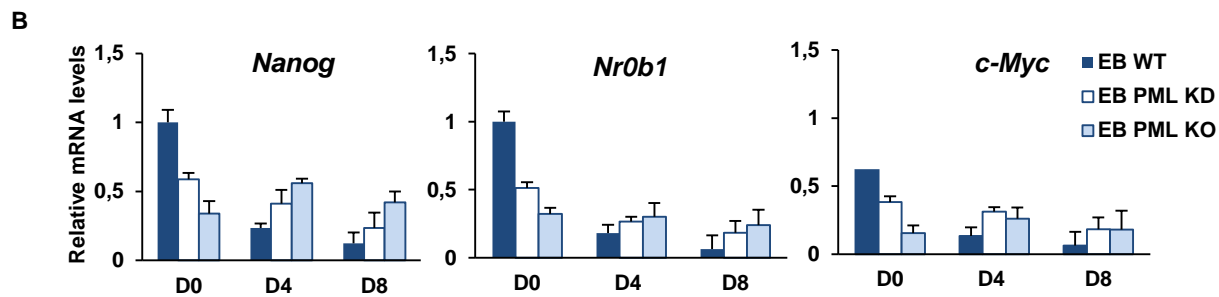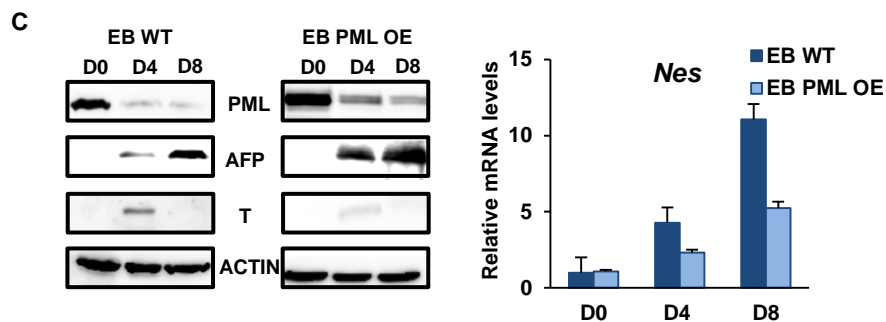

**Figure S4 (related to Figure 4): Genome wide analysis from EB D4 PML WT and PML KD** **A.** Heat map representing differential expression of genes in PML KD EB D4 compared to EB D4 WT. GO analysis was performed using RNEA software. Representative enriched terms were also shown. **B.** mRNA levels of *Nanog*, *c-myc*, *Nr0b1* in PML KD, KO and control EB D4. Error bars indicate +SD of four independent experiments (n=4). **C.** Protein levels of PML, AFP and T upon differentiation of WT and PML OE ESC (left panel). Characteristic ectodermal gene (*Nes*) mRNA levels (right panel). Data are shown as mean + SD of three independent experiments (n=3).

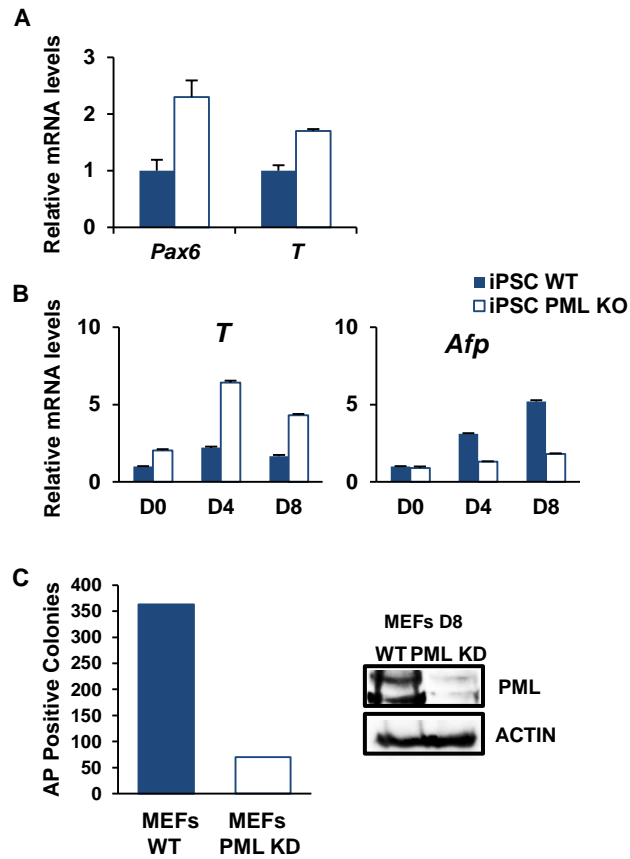

**Figure S5 (related to Figure 5): Characterization of the derived *Pml*<sup>-/-</sup> and WT iPSC colonies. A.** mRNA levels of developmental markers (*Pax6* and *T*) in *Pml*<sup>-/-</sup> and WT iPSC. **B.** *T* and *Afp* mRNA levels upon differentiation of *Pml*<sup>-/-</sup> or WT iPSC. **C.** AP-positive colony numbers 28 days after OSKM lentiviral transduction in combination with shRNA against *Pml*. PML protein expression levels at D8 of reprogramming process. Data are shown as mean + SD of four independent experiments (n=4).

## **Supplementary Experimental Procedures**

### **Reverse Transcription and RT-PCR**

Total RNA was isolated using TRIzol Reagent (Invitrogen). cDNA was subsequently reverse-transcribed from 2µg RNA by M-MLV Reverse Transcriptase (Takara) supplemented with RNase inhibitor (HT Biotechnology). Target genes expression was normalized against Actin. Primer sets used for real time PCR analysis are shown below. Relative abundance of each transcript was measured by quantitative real time PCR with SYBR Green I (Invitrogen).

1. **Actin** FOR: 5' GTGTGACGTTGACATCCGTA 3', REV: 5' GTAACAGTCCGCCTAGAAGC 3',
2. **Afp** FOR: 5' AAGCTGCGCTCTCTACCACCAGA 3', REV: 5' ACCACAGCCGGACCATT 3',
3. **Eomes** FOR: 5' GCTTCCGGGACAACACTACGA 3', REV: 5' GAGAGGAGGCCGTTGGTCT 3',
4. **Fgf5** FOR: 5' GCAGAAGTAGCGCGACGTTT 3', REV: 5' TTGACTTTGCCATCCGGGTAG 3',
5. **Fzd2** FOR: 5'AGTTCACGGGGAGAAGGG 3', REV: 5' AGCGGGTAGAACTGATGCAC 3',
6. **Gata4** FOR: 5' GCCAACTGCCAACTACCAC 3', REV: 5' GACCTGCTGGCGTCTTAGA 3',
7. **Gata6** FOR: 5' GCCACTGTGGAGACGAGA 3', REV: 5' CATATAGAGCCCCGAAGCA 3',
8. **Hand1** FOR: 5' ACCAGTTACATCGCCTACTTGA 3', REV: 5'CGCGACCACCATCCGTCTT 3',
9. **Id1** FOR: 5' GACTACATCAGGGACCTGCAGC 3', REV: 5' GGCCGCAAGGCACTGATCTCG 3',
10. **Id2** FOR: 5' ATCCCCAGAACAACAAGGT 3', REV: 5' ACCTTCTGTTCTGGGGGAT 3',
11. **Id3** FOR: 5' CCAGGTGGAATCCTGCACC 3', REV: 5' CTCTTGTCTTGGAGATCACAA 3',
12. **Jmjd3** FOR: 5' GTACAGACCCCCGGAACC 3', REV: 5' TGGTGGAGAAAAGGCCTAAG 3'
13. **Junb** FOR: 5' ACCCTACCGGAGTCTCAA 3', REV: 5' GGAGTAGCTGCTGCTGAGGTTG 3'
14. **Lefty2** FOR: 5' AGCACGCGACCGCTCCC 3', REV:5' CGATGCTCCATTCCGAACAC 3'
15. **Nanog** FOR: 5' CGCTGCTCCGCTCCATAACT 3', REV: 5' GCGCATGGCTTTCCCTAGTG 3',
16. **NrOb1** FOR: 5' CTGGTGTGCAGCGTCTGA 3', REV: 5' GTGTTGGTCTCCGGATCTC 3',
17. **Pax6** FOR: 5' GGTGCTGGACAATGAAAACA 3', REV: 5' GGTACAGACCCCTCGGATAA 3',
18. **Pim-1** FOR: 5' ATGCTCTTGTCAAAATCAACTCGCTTGCC-3', REV: 5' TGATGAAGTCGAAGAGATCTTGACCGGCT-3'
19. **Oct4** FOR: 5' CCCTGGGCGTTCTCTTTGGA 3', REV: 5' ACCAGGTCTCCGATTTGCAT 3',
20. **Otx2** FOR: 5' CCGGAAACAGCGAAGGGA 3', REV: 5' GCTGTTGGCGGCACTTAG 3',
21. **Sox17** FOR: 5' CTCTGCCCTGCCGGGATGG 3', REV: 5' AATGTCGGGGTAGTTGCAATA 3',
22. **T** FOR: 5' GTTCCCGGTGCTGAAGGTAAT 3', REV: 5' GCGAGTCTGGGTGGATGTAGA 3'
23. **Wnt8a** FOR: 5' GGGAACGGTGAATTGTCCTG 3' REV: 5'GCAGAGCGGATGGCATGAA 3'

### **Co-Immunoprecipitation**

IP of in vivo interacting protein complexes was performed using PML OE and PML KO stable ESC cell lines. Cells were lysed in EBC buffer (50mM Tris PH 8, 170mM NaCl, 0.5% NP40, 50mM NaF) containing 1 mM PMSF and protease inhibitors (Roche Applied Science). 200µg whole cell extracts were incubated with primary antibody overnight. The following day, 20µl of protein G sepharose beads were added to each sample and incubated at 4°C for 3hr. The beads were centrifuged and washed three times in 1 ml of NETN buffer (10Mm Tris PH 8, 250nM NaCl, 5mM EDTA, 0.5% NP40). SDS sample buffer was added and immunoprecipitated proteins were resolved by SDS-PAGE, followed by Western blotting as previously described (Niture and Jaiswal, 2009).

## **Antibodies**

In this study, proteins were detected by primary antibodies against ACTIN (sc-47778, Santa Cruz), AFP (2137S, Cell Signaling), CCND1 (sc-8396, Santa Cruz), CDH1 (3195, Cell signaling), c-MYC (Sigma), NANOG (8600S, Cell Signaling), NROB1 (sc-13034X, Santa Cruz), OCT3/4 (sc-5279, Santa Cruz), PML (sc-18423, Santa Cruz), pRB (9309, Cell signaling), p-pRB(9308, Cell signaling), p-SMAD2/3 (3101, Cell Signaling), SNAI1 (3879, Cell Signaling), STAT3 (12640, Cell signaling), p-STAT3 (9131, Cell signaling), SOX2 (14962, Cell Signalling), T (sc-17745, Santa Cruz), VIM (5741, Cell Signaling) and ZEB1 (sc-25388, Santa Cruz).

## **Luciferase Assay**

PML KD, PML OE and CGR8 ESC cell lines were transfected with APRE-Luc, CAGA-Luc or BRE-Luc reporter plasmids using Lipofectamine 2000 following the manufacturer's protocol. Cells were stimulated with LIF (100ng/ml), Activin A (25ng/ml, R&D) and BMP4 (80ng/ml, R&D) respectively, 16h before harvesting for measurement of luciferase activity using the dual-luciferase reporter assay system (Promega).

## **Oxygen Consumption Rate (OCR)**

Oxygen consumption rates were measured using a Clark-type electrode (Hansatech Instruments). Briefly, cells were washed and collected in 1 ml PBS buffer and subsequently transferred into a cylindrical chamber with a magnetic cylindrical stirring bar. The chamber was kept at 37°C, and measurements were done for 10–15 min, depending on the oxygen consumption rate. The slope of the straight portion of the plot was used to derive the oxygen consumption rate. Cells were then collected for protein quantification. Rates were normalized to protein content.

## **Mitochondrial membrane potential measurement**

Cells were washed with PBS, and 1 ml of DMEM with 100 nM TMRE (Invitrogen) was added to the culture plate for incubation at 37°C for 20 min. Cells were then resuspended in PBS and TMRE staining was analyzed at Ex/Em = 549/575 nm either by flow cytometry (BD FACS Canto II System) or by Operetta fluorescence microscope (PerkinElmer). Channel FL2 was used to detect the fluorescent signal as stained by TMRE.

## **Flow cytometry**

For cell cycle analysis, 100.000 cells from each sample were trypsinized, washed with PBS, and fixed in 70% ethanol at 25°C for 10 min. Cells were suspended in 20 µl PBS and 10 µl RNase A (5 mg/ml). treated for 20 min at 37 °C and stained with propidium iodide (PI-Sigma) according to the manufacturer's protocol. Flow cytometry was performed on a BD FACS Canto II System and cell cycle distribution was analyzed using ModFIT LT Software.
